# Supplementary material for: Mechanistic insights of the degradation of an O-anisidine carcinogenic pollutant initiated by OH radical attack: theoretical investigations
Source: Royal Society of Chemistry journal article supplement (doi:10.1039/d0nj06248k), 2021-01-01

## Supporting Information

### Mechanistic insights of degradation of O-Anisidine carcinogenic pollutant initiated by OH radical attack: Theoretical investigations

Mohamed A. Abdel-Rahman<sup>1</sup>, Mohamed F. Shibl<sup>2,\*\*</sup>, Safwat Abdel-Azeim<sup>3</sup>, Safinaz  
H. El-demerdash<sup>1</sup>, Nessreen Al-Hashimi<sup>2</sup>, and Ahmed M. El-Nahas<sup>1,\*</sup>

<sup>1</sup>Chemistry Department, Faculty of Science, Menoufia University, Shebin El-Kom,  
Egypt

<sup>2</sup>Department of Chemistry and Earth Sciences, College of Arts and Sciences, Qatar  
University, P.O. Box 2713, Doha, Qatar

<sup>3</sup>Center for Integrative Petroleum Research (CIPR), College of Petroleum Engineering  
and Geosciences, King Fahd University of Petroleum and Minerals (KFUPM),  
Dhahran 31261, Saudi Arabia

Table S1. Optimized structures of reactants, products, and transition states at M06-  
2X/6-311++G(2df,2p) and electronic energies at ROCBS-QB3.

Table S2. Variation of bond distances along the reaction coordinates for OH reaction  
with O-AND.

Table S3. Geometrical parameters (bond lengths and bond angles) of O-AND  
obtained at different levels.

Table S4. Calculated excitation energies (eV), wavelengths (nm), and oscillator  
strength (f, in a.u.) using TDDFT/6-311++G(2df,2p)//M06-2X/6-311++G(2df,2p)  
level of theory

Fig S1. (a) Energy level diagram of electrons in O, H atoms and OH molecule. (b)  
Electronic configuration in the ground state  $X^2\Pi$ , and (c) in the first excited  $A^2\Sigma$  state.

Fig S2. Relative energies (kcal/mol) vs. IRC for main OH addition reaction P2 (a) and  
H abstraction reaction P8 (b).

Table S1. Optimized structures of reactants, products, and transition states at M06-2X/6-311++G(2df,2p) and electronic energies at ROCBS-QB3.

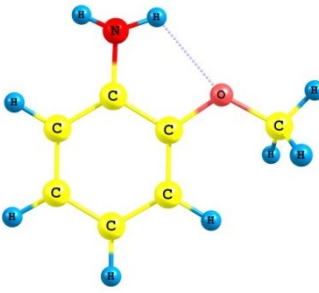

O-AND (trans form)

|                                              |              |              |                             |
|----------------------------------------------|--------------|--------------|-----------------------------|
| 6                                            | 1.333947000  | -1.688116000 | 0.004515000                 |
| 6                                            | -0.027647000 | -1.387770000 | -0.000011000                |
| 6                                            | 2.262801000  | -0.665106000 | 0.005905000                 |
| 1                                            | -0.750681000 | -2.189873000 | 0.003347000                 |
| 1                                            | 3.320806000  | -0.887426000 | 0.011167000                 |
| 6                                            | -0.446660000 | -0.069542000 | -0.005372000                |
| 6                                            | 1.840562000  | 0.659521000  | -0.001525000                |
| 1                                            | 2.565352000  | 1.464254000  | -0.009776000                |
| 6                                            | 0.490196000  | 0.978673000  | -0.009241000                |
| 1                                            | 1.652723000  | -2.720725000 | 0.008300000                 |
| 6                                            | -2.741620000 | -0.665370000 | 0.003255000                 |
| 1                                            | -3.697346000 | -0.149558000 | 0.005558000                 |
| 1                                            | -2.670389000 | -1.292732000 | -0.888364000                |
| 1                                            | -2.666153000 | -1.294414000 | 0.893590000                 |
| 7                                            | 0.033929000  | 2.289207000  | -0.074850000                |
| 1                                            | 0.660104000  | 2.983022000  | 0.297811000                 |
| 1                                            | -0.923018000 | 2.415657000  | 0.212325000                 |
| 8                                            | -1.749797000 | 0.334201000  | 0.000605000                 |
| Zero-point correction=                       |              |              | 0.151105 (Hartree/Particle) |
| Thermal correction to Energy=                |              |              | 0.159218                    |
| Thermal correction to Enthalpy=              |              |              | 0.160162                    |
| Thermal correction to Gibbs Free Energy=     |              |              | 0.118760                    |
| Sum of electronic and zero-point Energies=   |              |              | -401.943619                 |
| Sum of electronic and thermal Energies=      |              |              | -401.935505                 |
| Sum of electronic and thermal Enthalpies=    |              |              | -401.934561                 |
| Sum of electronic and thermal Free Energies= |              |              | -401.975963                 |
| Electronic energy at ROCBS-QB3=              |              |              | -401.577273                 |

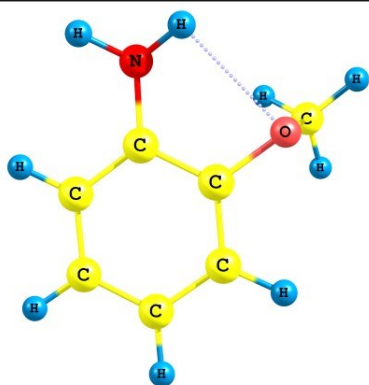

O-AND (gauche form)

|   |              |              |              |
|---|--------------|--------------|--------------|
| 6 | 1.844477000  | -1.282227000 | 0.011319000  |
| 6 | 0.488411000  | -1.447800000 | -0.240865000 |
| 6 | 2.342368000  | -0.004901000 | 0.224464000  |
| 1 | 0.063120000  | -2.426689000 | -0.421632000 |
| 1 | 3.396061000  | 0.140557000  | 0.420043000  |
| 6 | -0.352230000 | -0.351446000 | -0.276299000 |
| 6 | 1.501001000  | 1.097004000  | 0.183668000  |
| 1 | 1.896826000  | 2.091820000  | 0.347562000  |
| 6 | 0.140158000  | 0.942065000  | -0.069346000 |
| 1 | 2.501684000  | -2.139576000 | 0.035280000  |
| 6 | -2.480447000 | -0.676308000 | 0.619400000  |
| 1 | -3.517108000 | -0.738664000 | 0.297696000  |
| 1 | -2.200429000 | -1.598597000 | 1.133045000  |
| 1 | -2.354680000 | 0.167568000  | 1.302216000  |
| 7 | -0.747983000 | 2.013639000  | -0.075883000 |
| 1 | -0.330625000 | 2.908984000  | -0.271292000 |
| 1 | -1.578315000 | 1.843575000  | -0.623499000 |
| 8 | -1.692884000 | -0.500347000 | -0.550286000 |

Zero-point correction= 0.150923 (Hartree/Particle)

Thermal correction to Energy= 0.159162

Thermal correction to Enthalpy= 0.160106

Thermal correction to Gibbs Free Energy= 0.118214

Sum of electronic and zero-point Energies= -401.940781

Sum of electronic and thermal Energies= -401.932542

Sum of electronic and thermal Enthalpies= -401.931598

Sum of electronic and thermal Free Energies= -401.973491

Electronic energy at ROCBS-QB3= -401.574688

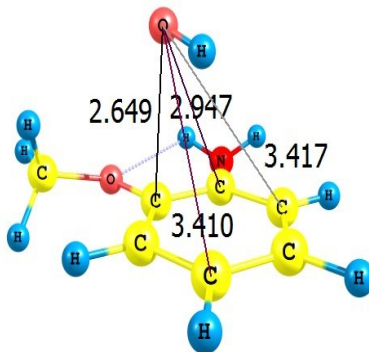

IMx

|                                              |              |              |                             |
|----------------------------------------------|--------------|--------------|-----------------------------|
| 6                                            | 1.369851000  | -1.637217000 | -0.389840000                |
| 6                                            | 0.014059000  | -1.331530000 | -0.480211000                |
| 6                                            | 2.293254000  | -0.618617000 | -0.220166000                |
| 1                                            | -0.708023000 | -2.126059000 | -0.594433000                |
| 1                                            | 3.347721000  | -0.845677000 | -0.145824000                |
| 6                                            | -0.411406000 | -0.014035000 | -0.395247000                |
| 6                                            | 1.871309000  | 0.703968000  | -0.148116000                |
| 1                                            | 2.593078000  | 1.500389000  | -0.017188000                |
| 6                                            | 0.523930000  | 1.029648000  | -0.235965000                |
| 1                                            | 1.691791000  | -2.666838000 | -0.450343000                |
| 7                                            | 0.066306000  | 2.333000000  | -0.202230000                |
| 1                                            | 0.663950000  | 2.990429000  | 0.269777000                 |
| 1                                            | -0.907776000 | 2.426684000  | 0.038383000                 |
| 8                                            | -0.363456000 | -0.327285000 | 2.233331000                 |
| 1                                            | 0.525159000  | -0.665390000 | 2.029639000                 |
| 8                                            | -1.706469000 | 0.386761000  | -0.449713000                |
| 6                                            | -2.697939000 | -0.610054000 | -0.318926000                |
| 1                                            | -2.703282000 | -1.276516000 | -1.183972000                |
| 1                                            | -2.536474000 | -1.187191000 | 0.594290000                 |
| 1                                            | -3.649238000 | -0.089612000 | -0.262835000                |
| Zero-point correction=                       |              |              | 0.162226 (Hartree/Particle) |
| Thermal correction to Energy=                |              |              | 0.173314                    |
| Thermal correction to Enthalpy=              |              |              | 0.174258                    |
| Thermal correction to Gibbs Free Energy=     |              |              | 0.124938                    |
| Sum of electronic and zero-point Energies=   |              |              | -477.673495                 |
| Sum of electronic and thermal Energies=      |              |              | -477.662408                 |
| Sum of electronic and thermal Enthalpies=    |              |              | -477.661464                 |
| Sum of electronic and thermal Free Energies= |              |              | -477.710784                 |
| Electronic energy at ROCBS-QB3=              |              |              | -477.245274                 |

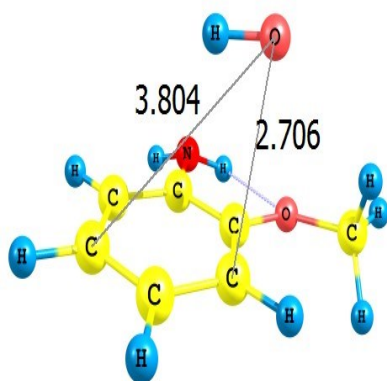

IMy

|                                              |              |              |                             |
|----------------------------------------------|--------------|--------------|-----------------------------|
| 6                                            | 0.026530000  | -1.163646000 | -0.654759000                |
| 6                                            | -1.306122000 | -1.575643000 | -0.608681000                |
| 6                                            | 0.361292000  | 0.149020000  | -0.357181000                |
| 1                                            | -1.553900000 | -2.601710000 | -0.839536000                |
| 6                                            | -2.290844000 | -0.673039000 | -0.258547000                |
| 6                                            | -0.639202000 | 1.076996000  | -0.001885000                |
| 6                                            | -1.956116000 | 0.645141000  | 0.045157000                 |
| 1                                            | 0.797400000  | -1.872868000 | -0.915123000                |
| 8                                            | 0.746556000  | -1.271274000 | 1.951822000                 |
| 1                                            | -0.183330000 | -0.994579000 | 2.006441000                 |
| 7                                            | -0.263180000 | 2.363578000  | 0.349247000                 |
| 1                                            | -0.964150000 | 3.074623000  | 0.226958000                 |
| 1                                            | 0.656049000  | 2.636647000  | 0.042630000                 |
| 1                                            | -3.325723000 | -0.983159000 | -0.216076000                |
| 1                                            | -2.726538000 | 1.350893000  | 0.330010000                 |
| 8                                            | 1.618998000  | 0.655386000  | -0.378528000                |
| 6                                            | 2.688374000  | -0.258252000 | -0.506807000                |
| 1                                            | 3.599915000  | 0.323456000  | -0.407774000                |
| 1                                            | 2.640021000  | -1.010696000 | 0.282775000                 |
| 1                                            | 2.674614000  | -0.744009000 | -1.485165000                |
| Zero-point correction=                       |              |              | 0.161614 (Hartree/Particle) |
| Thermal correction to Energy=                |              |              | 0.172983                    |
| Thermal correction to Enthalpy=              |              |              | 0.173927                    |
| Thermal correction to Gibbs Free Energy=     |              |              | 0.123513                    |
| Sum of electronic and zero-point Energies=   |              |              | -477.673231                 |
| Sum of electronic and thermal Energies=      |              |              | -477.661863                 |
| Sum of electronic and thermal Enthalpies=    |              |              | -477.660918                 |
| Sum of electronic and thermal Free Energies= |              |              | -477.711332                 |
| Electronic energy at ROCBS-QB3=              |              |              | -477.244602                 |

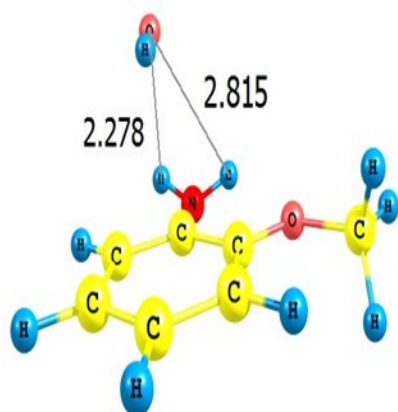

IMz

|                                              |              |              |                             |
|----------------------------------------------|--------------|--------------|-----------------------------|
| 6                                            | -0.287425000 | 2.322377000  | 0.336243000                 |
| 6                                            | -1.159822000 | 1.234439000  | 0.303149000                 |
| 6                                            | 1.026356000  | 2.163447000  | -0.060441000                |
| 1                                            | -2.184167000 | 1.361964000  | 0.620008000                 |
| 1                                            | 1.710046000  | 3.000252000  | -0.034985000                |
| 6                                            | -0.713666000 | -0.000765000 | -0.130647000                |
| 6                                            | 1.477854000  | 0.921662000  | -0.496611000                |
| 1                                            | 2.505433000  | 0.791454000  | -0.813072000                |
| 6                                            | 0.621022000  | -0.171187000 | -0.546236000                |
| 1                                            | -0.646667000 | 3.283011000  | 0.676096000                 |
| 7                                            | 1.026769000  | -1.411266000 | -1.006071000                |
| 1                                            | 2.016441000  | -1.597689000 | -1.006825000                |
| 1                                            | 0.449635000  | -2.192543000 | -0.740626000                |
| 8                                            | 2.422699000  | -1.789154000 | 1.226164000                 |
| 1                                            | 1.973117000  | -0.938781000 | 1.370084000                 |
| 8                                            | -1.472398000 | -1.129153000 | -0.193322000                |
| 6                                            | -2.816909000 | -1.036056000 | 0.218727000                 |
| 1                                            | -3.367915000 | -0.324764000 | -0.400310000                |
| 1                                            | -3.243492000 | -2.027013000 | 0.098134000                 |
| 1                                            | -2.886683000 | -0.734080000 | 1.266156000                 |
| Zero-point correction=                       |              |              | 0.162121 (Hartree/Particle) |
| Thermal correction to Energy=                |              |              | 0.173313                    |
| Thermal correction to Enthalpy=              |              |              | 0.174258                    |
| Thermal correction to Gibbs Free Energy=     |              |              | 0.123501                    |
| Sum of electronic and zero-point Energies=   |              |              | -477.671449                 |
| Sum of electronic and thermal Energies=      |              |              | -477.660257                 |
| Sum of electronic and thermal Enthalpies=    |              |              | -477.659313                 |
| Sum of electronic and thermal Free Energies= |              |              | -477.710069                 |
| Electronic energy at ROCBS-QB3=              |              |              | -477.243318                 |

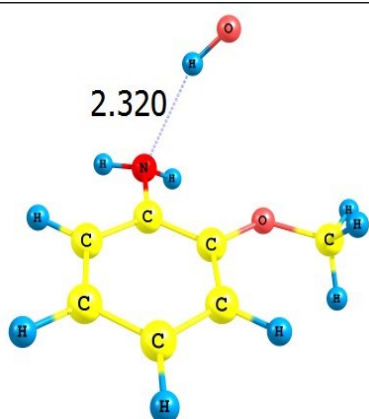

IMt

|                                              |              |              |                             |
|----------------------------------------------|--------------|--------------|-----------------------------|
| 6                                            | 2.041673000  | 1.301112000  | 0.363649000                 |
| 6                                            | 0.694905000  | 1.467109000  | 0.047108000                 |
| 6                                            | 2.611745000  | 0.042352000  | 0.329425000                 |
| 1                                            | 0.250851000  | 2.451082000  | 0.077526000                 |
| 1                                            | 3.655839000  | -0.091337000 | 0.574453000                 |
| 6                                            | -0.069951000 | 0.368820000  | -0.302314000                |
| 6                                            | 1.839577000  | -1.061330000 | -0.018545000                |
| 1                                            | 2.278177000  | -2.051454000 | -0.036631000                |
| 6                                            | 0.499697000  | -0.912850000 | -0.332542000                |
| 1                                            | 2.633980000  | 2.162871000  | 0.636323000                 |
| 7                                            | -0.347927000 | -2.002440000 | -0.597650000                |
| 1                                            | 0.144353000  | -2.847157000 | -0.845600000                |
| 1                                            | -1.072153000 | -1.786114000 | -1.269259000                |
| 8                                            | -2.342226000 | -0.974816000 | 1.415207000                 |
| 1                                            | -1.708194000 | -1.557605000 | 0.951709000                 |
| 8                                            | -1.387869000 | 0.406189000  | -0.638273000                |
| 6                                            | -2.112444000 | 1.576935000  | -0.319731000                |
| 1                                            | -1.988388000 | 1.824492000  | 0.735816000                 |
| 1                                            | -1.793932000 | 2.417043000  | -0.940137000                |
| 1                                            | -3.155497000 | 1.351390000  | -0.518424000                |
| Zero-point correction=                       |              |              | 0.163020 (Hartree/Particle) |
| Thermal correction to Energy=                |              |              | 0.173726                    |
| Thermal correction to Enthalpy=              |              |              | 0.174670                    |
| Thermal correction to Gibbs Free Energy=     |              |              | 0.126084                    |
| Sum of electronic and zero-point Energies=   |              |              | -477.673413                 |
| Sum of electronic and thermal Energies=      |              |              | -477.662707                 |
| Sum of electronic and thermal Enthalpies=    |              |              | -477.661763                 |
| Sum of electronic and thermal Free Energies= |              |              | -477.710348                 |
| Electronic energy at ROCBS-QB3=              |              |              | -477.246685                 |

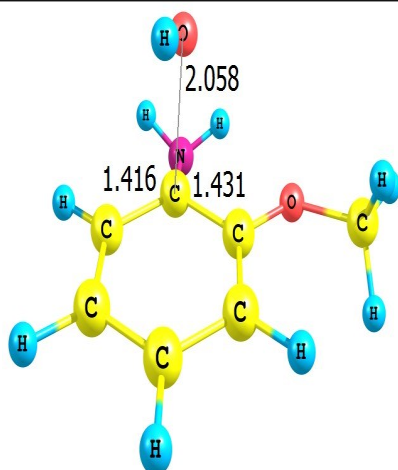

TS1

|                                              |              |              |                             |
|----------------------------------------------|--------------|--------------|-----------------------------|
| 6                                            | 0.520275000  | -0.197088000 | -0.217849000                |
| 6                                            | 0.158999000  | -1.521439000 | -0.035555000                |
| 6                                            | -0.480364000 | 0.818763000  | -0.335129000                |
| 1                                            | 0.916344000  | -2.280773000 | 0.085262000                 |
| 6                                            | -1.185366000 | -1.875633000 | -0.012533000                |
| 6                                            | -1.835074000 | 0.408211000  | -0.367219000                |
| 1                                            | -1.457440000 | -2.912174000 | 0.127975000                 |
| 6                                            | -2.179186000 | -0.909743000 | -0.183454000                |
| 1                                            | -3.220427000 | -1.198773000 | -0.178330000                |
| 1                                            | -2.591389000 | 1.168360000  | -0.511295000                |
| 7                                            | -0.104305000 | 2.070265000  | -0.772661000                |
| 1                                            | -0.768759000 | 2.787039000  | -0.521618000                |
| 1                                            | 0.827319000  | 2.318650000  | -0.471678000                |
| 8                                            | -0.335739000 | 1.143055000  | 1.691752000                 |
| 1                                            | -0.798976000 | 0.394798000  | 2.091317000                 |
| 8                                            | 1.779142000  | 0.259219000  | -0.291988000                |
| 6                                            | 2.827490000  | -0.631831000 | 0.028745000                 |
| 1                                            | 2.691038000  | -1.035654000 | 1.033272000                 |
| 1                                            | 2.881454000  | -1.448002000 | -0.693924000                |
| 1                                            | 3.743104000  | -0.050955000 | -0.012505000                |
| Zero-point correction=                       |              |              | 0.162610 (Hartree/Particle) |
| Thermal correction to Energy=                |              |              | 0.172755                    |
| Thermal correction to Enthalpy=              |              |              | 0.173699                    |
| Thermal correction to Gibbs Free Energy=     |              |              | 0.127004                    |
| Sum of electronic and zero-point Energies=   |              |              | -477.667508                 |
| Sum of electronic and thermal Energies=      |              |              | -477.657363                 |
| Sum of electronic and thermal Enthalpies=    |              |              | -477.656418                 |
| Sum of electronic and thermal Free Energies= |              |              | -477.703114                 |
| Electronic energy at ROCBS-QB3=              |              |              | -477.245642                 |



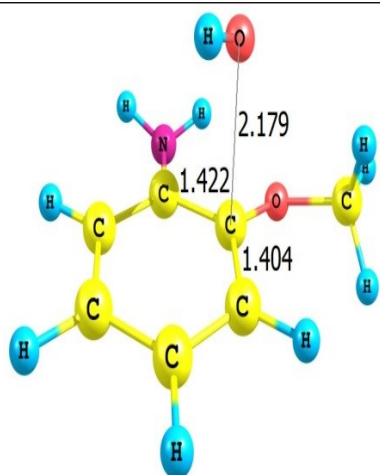

TS2

|                                              |              |              |                             |
|----------------------------------------------|--------------|--------------|-----------------------------|
| 6                                            | -0.084569000 | -1.421612000 | -0.289003000                |
| 6                                            | -1.433633000 | -1.678616000 | -0.168764000                |
| 6                                            | 0.385448000  | -0.098330000 | -0.291351000                |
| 1                                            | -1.786068000 | -2.699506000 | -0.139981000                |
| 6                                            | -2.341387000 | -0.619065000 | -0.089676000                |
| 6                                            | -0.541093000 | 0.979776000  | -0.245586000                |
| 1                                            | -3.399407000 | -0.822446000 | 0.000758000                 |
| 6                                            | -1.901755000 | 0.689271000  | -0.132326000                |
| 1                                            | -2.606857000 | 1.508907000  | -0.083397000                |
| 8                                            | 0.618610000  | 0.141302000  | 1.862022000                 |
| 1                                            | -0.179039000 | -0.297741000 | 2.188212000                 |
| 7                                            | -0.061212000 | 2.253113000  | -0.349592000                |
| 1                                            | 0.921252000  | 2.356736000  | -0.149439000                |
| 1                                            | -0.646843000 | 2.987415000  | 0.010043000                 |
| 8                                            | 1.657332000  | 0.258385000  | -0.559161000                |
| 6                                            | 2.666552000  | -0.689646000 | -0.263057000                |
| 1                                            | 2.531182000  | -1.065276000 | 0.751362000                 |
| 1                                            | 2.653927000  | -1.511161000 | -0.981782000                |
| 1                                            | 3.612094000  | -0.162198000 | -0.343622000                |
| 1                                            | 0.623333000  | -2.234688000 | -0.349328000                |
| Zero-point correction=                       |              |              | 0.162471 (Hartree/Particle) |
| Thermal correction to Energy=                |              |              | 0.172585                    |
| Thermal correction to Enthalpy=              |              |              | 0.173529                    |
| Thermal correction to Gibbs Free Energy=     |              |              | 0.127234                    |
| Sum of electronic and zero-point Energies=   |              |              | -477.671374                 |
| Sum of electronic and thermal Energies=      |              |              | -477.661261                 |
| Sum of electronic and thermal Enthalpies=    |              |              | -477.660317                 |
| Sum of electronic and thermal Free Energies= |              |              | -477.706612                 |
| Electronic energy at ROCBS-QB3=              |              |              | -477.246358                 |

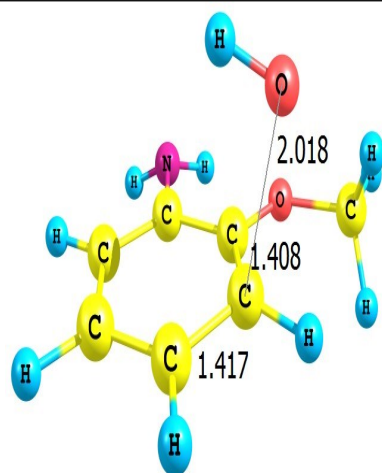

TS3

|                                              |              |              |                             |
|----------------------------------------------|--------------|--------------|-----------------------------|
| 6                                            | -1.999788000 | 0.588798000  | 0.035241000                 |
| 6                                            | -0.718209000 | 1.105895000  | 0.064047000                 |
| 6                                            | -2.235376000 | -0.759857000 | -0.278448000                |
| 6                                            | 0.358390000  | 0.244046000  | -0.227900000                |
| 6                                            | -1.191996000 | -1.603042000 | -0.548682000                |
| 6                                            | 0.139787000  | -1.125385000 | -0.469276000                |
| 1                                            | 0.935884000  | -1.726678000 | -0.876623000                |
| 1                                            | -1.358336000 | -2.642648000 | -0.788700000                |
| 8                                            | 0.794549000  | -1.720684000 | 1.344453000                 |
| 1                                            | 0.010207000  | -1.451090000 | 1.841792000                 |
| 1                                            | -3.252819000 | -1.123829000 | -0.307700000                |
| 1                                            | -2.831648000 | 1.243857000  | 0.261585000                 |
| 8                                            | 1.572109000  | 0.818725000  | -0.204921000                |
| 6                                            | 2.710247000  | 0.000229000  | -0.425670000                |
| 1                                            | 3.571928000  | 0.645417000  | -0.287648000                |
| 1                                            | 2.727952000  | -0.817544000 | 0.292651000                 |
| 1                                            | 2.709658000  | -0.389204000 | -1.445619000                |
| 7                                            | -0.444381000 | 2.420467000  | 0.417318000                 |
| 1                                            | 0.467374000  | 2.749319000  | 0.143672000                 |
| 1                                            | -1.181131000 | 3.080697000  | 0.233244000                 |
| Zero-point correction=                       |              |              | 0.162978 (Hartree/Particle) |
| Thermal correction to Energy=                |              |              | 0.173055                    |
| Thermal correction to Enthalpy=              |              |              | 0.174000                    |
| Thermal correction to Gibbs Free Energy=     |              |              | 0.127671                    |
| Sum of electronic and zero-point Energies=   |              |              | -477.665716                 |
| Sum of electronic and thermal Energies=      |              |              | -477.655639                 |
| Sum of electronic and thermal Enthalpies=    |              |              | -477.654695                 |
| Sum of electronic and thermal Free Energies= |              |              | -477.701023                 |
| Electronic energy at ROCBS-QB3=              |              |              | -477.243482                 |

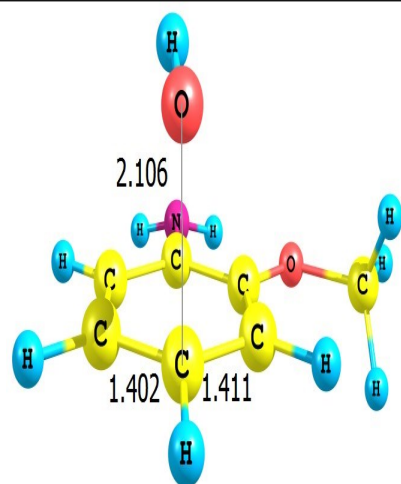

TS4

|                                              |              |              |                             |
|----------------------------------------------|--------------|--------------|-----------------------------|
| 6                                            | 0.277243000  | 1.257831000  | 0.034996000                 |
| 6                                            | 0.694683000  | -0.085893000 | -0.134887000                |
| 6                                            | -1.060467000 | 1.580830000  | -0.195949000                |
| 6                                            | -0.203219000 | -1.053370000 | -0.508003000                |
| 6                                            | -1.965725000 | 0.608669000  | -0.571465000                |
| 1                                            | 0.109080000  | -2.078810000 | -0.632084000                |
| 6                                            | -1.565200000 | -0.730063000 | -0.685795000                |
| 1                                            | -2.227874000 | -1.458007000 | -1.123517000                |
| 1                                            | -3.000192000 | 0.868540000  | -0.742515000                |
| 8                                            | -2.410362000 | -1.408050000 | 1.119977000                 |
| 1                                            | -1.961921000 | -0.756528000 | 1.676503000                 |
| 1                                            | -1.377649000 | 2.608353000  | -0.071395000                |
| 7                                            | 1.195611000  | 2.182149000  | 0.457674000                 |
| 1                                            | 2.165816000  | 1.925798000  | 0.392071000                 |
| 1                                            | 0.980747000  | 3.154818000  | 0.328483000                 |
| 8                                            | 2.021097000  | -0.287544000 | 0.097923000                 |
| 6                                            | 2.508152000  | -1.604772000 | -0.035284000                |
| 1                                            | 2.001790000  | -2.279115000 | 0.658179000                 |
| 1                                            | 2.375481000  | -1.969084000 | -1.056271000                |
| 1                                            | 3.566762000  | -1.565637000 | 0.201955000                 |
| Zero-point correction=                       |              |              | 0.162471 (Hartree/Particle) |
| Thermal correction to Energy=                |              |              | 0.172778                    |
| Thermal correction to Enthalpy=              |              |              | 0.173722                    |
| Thermal correction to Gibbs Free Energy=     |              |              | 0.126417                    |
| Sum of electronic and zero-point Energies=   |              |              | -477.666309                 |
| Sum of electronic and thermal Energies=      |              |              | -477.656002                 |
| Sum of electronic and thermal Enthalpies=    |              |              | -477.655057                 |
| Sum of electronic and thermal Free Energies= |              |              | -477.702362                 |
| Electronic energy at ROCBS-QB3=              |              |              | -477.242265                 |

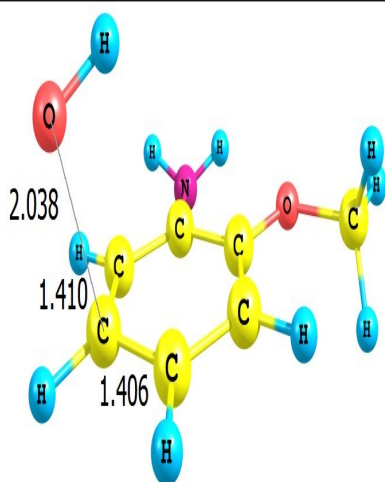

TS5

|                                              |              |              |                             |
|----------------------------------------------|--------------|--------------|-----------------------------|
| 6                                            | 0.794586000  | -0.083668000 | -0.097650000                |
| 6                                            | 0.169465000  | -1.300237000 | -0.337379000                |
| 6                                            | 0.065472000  | 1.131969000  | -0.151622000                |
| 1                                            | 0.734365000  | -2.219427000 | -0.304722000                |
| 6                                            | -1.186451000 | -1.336472000 | -0.619693000                |
| 6                                            | -1.280715000 | 1.079635000  | -0.430534000                |
| 1                                            | -1.678313000 | -2.280457000 | -0.799973000                |
| 6                                            | -1.943234000 | -0.151576000 | -0.611063000                |
| 1                                            | -2.946969000 | -0.155670000 | -1.004136000                |
| 1                                            | -1.847731000 | 2.000011000  | -0.477727000                |
| 7                                            | 0.753890000  | 2.323493000  | 0.021044000                 |
| 1                                            | 0.199147000  | 3.102105000  | 0.334682000                 |
| 1                                            | 1.640070000  | 2.240975000  | 0.491660000                 |
| 8                                            | -2.843128000 | -0.525792000 | 1.178510000                 |
| 1                                            | -2.036724000 | -0.553326000 | 1.711293000                 |
| 8                                            | 2.106698000  | 0.063356000  | 0.199548000                 |
| 6                                            | 2.908758000  | -1.097266000 | 0.256712000                 |
| 1                                            | 2.551751000  | -1.780782000 | 1.029441000                 |
| 1                                            | 2.919639000  | -1.610173000 | -0.706623000                |
| 1                                            | 3.911683000  | -0.762528000 | 0.501703000                 |
| Zero-point correction=                       |              |              | 0.162528 (Hartree/Particle) |
| Thermal correction to Energy=                |              |              | 0.172826                    |
| Thermal correction to Enthalpy=              |              |              | 0.173770                    |
| Thermal correction to Gibbs Free Energy=     |              |              | 0.126474                    |
| Sum of electronic and zero-point Energies=   |              |              | -477.663061                 |
| Sum of electronic and thermal Energies=      |              |              | -477.652763                 |
| Sum of electronic and thermal Enthalpies=    |              |              | -477.651819                 |
| Sum of electronic and thermal Free Energies= |              |              | -477.699115                 |
| Electronic energy at ROCBS-QB3=              |              |              | -477.240588                 |

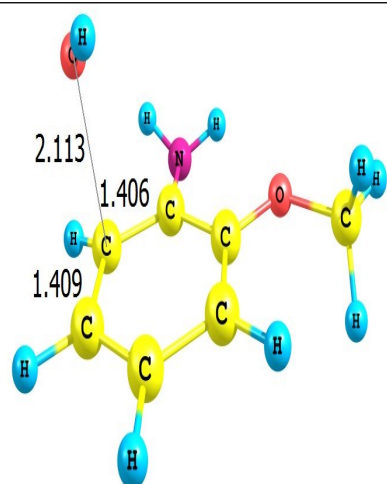

TS6

|                                              |              |              |                             |
|----------------------------------------------|--------------|--------------|-----------------------------|
| 6                                            | -0.635109000 | 1.432878000  | 0.063183000                 |
| 6                                            | 0.618844000  | 2.053249000  | -0.093215000                |
| 6                                            | -0.763432000 | 0.073588000  | -0.109760000                |
| 1                                            | 0.695485000  | 3.123391000  | 0.035648000                 |
| 6                                            | 1.723076000  | 1.309296000  | -0.417148000                |
| 6                                            | 0.363306000  | -0.713211000 | -0.435554000                |
| 1                                            | 2.687543000  | 1.777659000  | -0.550082000                |
| 6                                            | 1.617459000  | -0.088501000 | -0.555985000                |
| 1                                            | 2.438056000  | -0.655187000 | -0.967958000                |
| 8                                            | 2.290844000  | -0.905392000 | 1.273208000                 |
| 1                                            | 1.926490000  | -0.212512000 | 1.840928000                 |
| 7                                            | 0.221908000  | -2.058401000 | -0.621073000                |
| 1                                            | -0.638635000 | -2.455996000 | -0.280548000                |
| 1                                            | 1.045314000  | -2.602521000 | -0.415628000                |
| 8                                            | -1.920104000 | -0.632369000 | 0.018745000                 |
| 6                                            | -3.088216000 | 0.087160000  | 0.341303000                 |
| 1                                            | -2.986675000 | 0.586772000  | 1.307355000                 |
| 1                                            | -3.315315000 | 0.828917000  | -0.427534000                |
| 1                                            | -3.892563000 | -0.640078000 | 0.392119000                 |
| 1                                            | -1.494545000 | 2.033697000  | 0.320638000                 |
| Zero-point correction=                       |              |              | 0.162735 (Hartree/Particle) |
| Thermal correction to Energy=                |              |              | 0.172972                    |
| Thermal correction to Enthalpy=              |              |              | 0.173916                    |
| Thermal correction to Gibbs Free Energy=     |              |              | 0.126724                    |
| Sum of electronic and zero-point Energies=   |              |              | -477.669094                 |
| Sum of electronic and thermal Energies=      |              |              | -477.658857                 |
| Sum of electronic and thermal Enthalpies=    |              |              | -477.657912                 |
| Sum of electronic and thermal Free Energies= |              |              | -477.705105                 |
| Electronic energy at ROCBS-QB3=              |              |              | -477.244963                 |

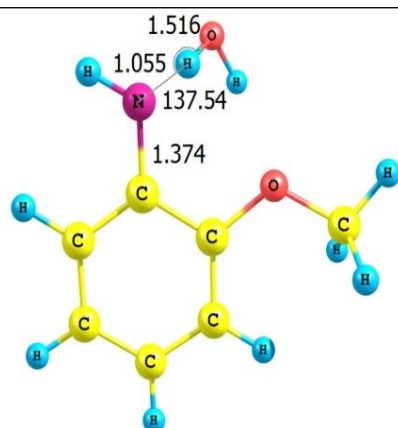

TS7

|                                              |              |              |                             |
|----------------------------------------------|--------------|--------------|-----------------------------|
| 6                                            | -2.413725000 | 0.692611000  | 0.325746000                 |
| 6                                            | -2.555808000 | -0.678550000 | 0.185017000                 |
| 6                                            | -1.163936000 | 1.287748000  | 0.174242000                 |
| 1                                            | -3.524245000 | -1.142072000 | 0.309323000                 |
| 1                                            | -1.062399000 | 2.355724000  | 0.295866000                 |
| 6                                            | -1.450832000 | -1.459908000 | -0.110069000                |
| 6                                            | -0.059017000 | 0.510369000  | -0.129854000                |
| 6                                            | -0.192982000 | -0.885253000 | -0.290248000                |
| 1                                            | -3.269824000 | 1.308988000  | 0.561101000                 |
| 7                                            | 0.899450000  | -1.626072000 | -0.671594000                |
| 1                                            | 1.868911000  | -1.299618000 | -0.414188000                |
| 1                                            | 0.798407000  | -2.622653000 | -0.540097000                |
| 8                                            | 2.799725000  | -1.390736000 | 0.778808000                 |
| 1                                            | 2.526984000  | -0.578167000 | 1.228153000                 |
| 8                                            | 1.204024000  | 0.977649000  | -0.274188000                |
| 6                                            | 1.410562000  | 2.370184000  | -0.172334000                |
| 1                                            | 0.839855000  | 2.904858000  | -0.934400000                |
| 1                                            | 1.129564000  | 2.738165000  | 0.816922000                 |
| 1                                            | 2.472058000  | 2.531290000  | -0.332998000                |
| 1                                            | -1.551012000 | -2.532526000 | -0.220477000                |
| Zero-point correction=                       |              |              | 0.159753 (Hartree/Particle) |
| Thermal correction to Energy=                |              |              | 0.170087                    |
| Thermal correction to Enthalpy=              |              |              | 0.171031                    |
| Thermal correction to Gibbs Free Energy=     |              |              | 0.123234                    |
| Sum of electronic and zero-point Energies=   |              |              | -477.667911                 |
| Sum of electronic and thermal Energies=      |              |              | -477.657577                 |
| Sum of electronic and thermal Enthalpies=    |              |              | -477.656633                 |
| Sum of electronic and thermal Free Energies= |              |              | -477.704431                 |
| Electronic energy at ROCBS-QB3=              |              |              | -477.237833                 |

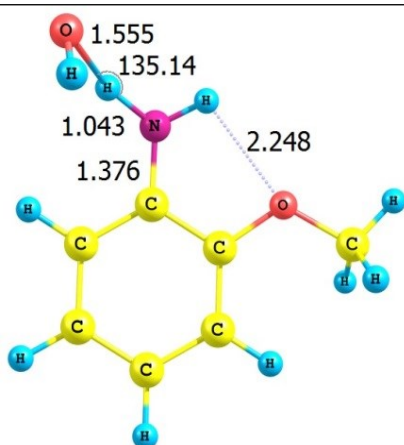

TS8

|                                              |              |                             |              |
|----------------------------------------------|--------------|-----------------------------|--------------|
| 6                                            | -0.998155000 | 2.188242000                 | 0.257446000  |
| 6                                            | -1.549822000 | 0.909358000                 | 0.238867000  |
| 6                                            | 0.341997000  | 2.376911000                 | -0.040464000 |
| 1                                            | -2.594269000 | 0.774282000                 | 0.476197000  |
| 1                                            | 0.769318000  | 3.369333000                 | -0.021666000 |
| 6                                            | -0.756053000 | -0.180285000                | -0.076466000 |
| 6                                            | 1.137868000  | 1.290230000                 | -0.366043000 |
| 1                                            | 2.186394000  | 1.418354000                 | -0.602059000 |
| 6                                            | 0.606332000  | 0.002310000                 | -0.390926000 |
| 1                                            | -1.625260000 | 3.031861000                 | 0.509136000  |
| 6                                            | -2.536582000 | -1.725333000                | 0.177798000  |
| 1                                            | -3.193215000 | -1.211819000                | -0.527661000 |
| 1                                            | -2.671148000 | -2.798462000                | 0.083088000  |
| 1                                            | -2.782040000 | -1.415204000                | 1.195781000  |
| 7                                            | 1.375421000  | -1.081335000                | -0.749150000 |
| 1                                            | 2.395829000  | -1.027703000                | -0.539933000 |
| 1                                            | 0.963079000  | -1.982358000                | -0.553477000 |
| 8                                            | 3.266834000  | -1.162437000                | 0.740931000  |
| 1                                            | 2.763267000  | -0.709686000                | 1.431722000  |
| 8                                            | -1.181009000 | -1.468545000                | -0.116975000 |
| Zero-point correction=                       |              | 0.159917 (Hartree/Particle) |              |
| Thermal correction to Energy=                |              | 0.170464                    |              |
| Thermal correction to Enthalpy=              |              | 0.171408                    |              |
| Thermal correction to Gibbs Free Energy=     |              | 0.122689                    |              |
| Sum of electronic and zero-point Energies=   |              | -477.669597                 |              |
| Sum of electronic and thermal Energies=      |              | -477.659050                 |              |
| Sum of electronic and thermal Enthalpies=    |              | -477.658105                 |              |
| Sum of electronic and thermal Free Energies= |              | -477.706825                 |              |
| Electronic energy at ROCBS-QB3=              |              | -477.24019                  |              |

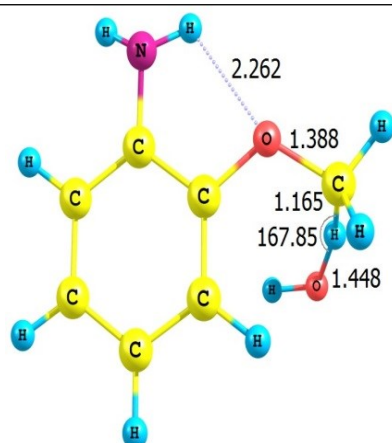

TS9

|                                              |              |              |                             |
|----------------------------------------------|--------------|--------------|-----------------------------|
| 6                                            | 0.987176000  | 1.909325000  | 0.375153000                 |
| 6                                            | -0.134149000 | 1.099113000  | 0.538697000                 |
| 6                                            | 2.182438000  | 1.350189000  | -0.039359000                |
| 1                                            | -1.069095000 | 1.536798000  | 0.857469000                 |
| 1                                            | 3.057213000  | 1.971555000  | -0.171209000                |
| 6                                            | -0.046911000 | -0.259995000 | 0.284968000                 |
| 6                                            | 2.268817000  | -0.013767000 | -0.288430000                |
| 1                                            | 3.206504000  | -0.451932000 | -0.606900000                |
| 6                                            | 1.164356000  | -0.840727000 | -0.131064000                |
| 1                                            | 0.913358000  | 2.968709000  | 0.573471000                 |
| 6                                            | -2.342520000 | -0.633963000 | 0.706634000                 |
| 1                                            | -2.701514000 | 0.095027000  | -0.127519000                |
| 1                                            | -3.039189000 | -1.466179000 | 0.727434000                 |
| 1                                            | -2.351848000 | -0.073671000 | 1.643161000                 |
| 7                                            | 1.228808000  | -2.211726000 | -0.317166000                |
| 1                                            | 1.957823000  | -2.535661000 | -0.929929000                |
| 1                                            | 0.342568000  | -2.667479000 | -0.461538000                |
| 8                                            | -2.848024000 | 1.042197000  | -1.212951000                |
| 1                                            | -1.906598000 | 1.202596000  | -1.388888000                |
| 8                                            | -1.087741000 | -1.137038000 | 0.391079000                 |
| Zero-point correction=                       |              |              | 0.158330 (Hartree/Particle) |
| Thermal correction to Energy=                |              |              | 0.168395                    |
| Thermal correction to Enthalpy=              |              |              | 0.169339                    |
| Thermal correction to Gibbs Free Energy=     |              |              | 0.122279                    |
| Sum of electronic and zero-point Energies=   |              |              | -477.665511                 |
| Sum of electronic and thermal Energies=      |              |              | -477.655447                 |
| Sum of electronic and thermal Enthalpies=    |              |              | -477.654502                 |
| Sum of electronic and thermal Free Energies= |              |              | -477.701562                 |
| Electronic energy at ROCBS-QB3=              |              |              | -477.23484                  |



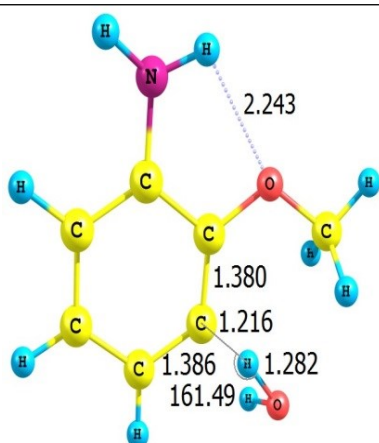

TS10

|                                              |              |              |                             |
|----------------------------------------------|--------------|--------------|-----------------------------|
| 6                                            | -0.008122000 | 1.965700000  | -0.093342000                |
| 6                                            | 0.623692000  | 0.732165000  | -0.081054000                |
| 6                                            | -1.391594000 | 1.996720000  | -0.048030000                |
| 1                                            | 1.838100000  | 0.761285000  | -0.143820000                |
| 1                                            | -1.913642000 | 2.943192000  | -0.065850000                |
| 6                                            | -0.065602000 | -0.461549000 | -0.010149000                |
| 6                                            | -2.113011000 | 0.811036000  | 0.022313000                 |
| 6                                            | -1.474760000 | -0.421595000 | 0.041733000                 |
| 1                                            | 0.573999000  | 2.874339000  | -0.152132000                |
| 8                                            | 3.058922000  | 1.083051000  | 0.076004000                 |
| 1                                            | 2.942776000  | 1.578597000  | 0.899746000                 |
| 1                                            | -3.194482000 | 0.835240000  | 0.068162000                 |
| 7                                            | -2.167038000 | -1.617520000 | 0.159779000                 |
| 1                                            | -3.113081000 | -1.607348000 | -0.182910000                |
| 1                                            | -1.645722000 | -2.435682000 | -0.111343000                |
| 8                                            | 0.472404000  | -1.705423000 | -0.010451000                |
| 6                                            | 1.881390000  | -1.807323000 | -0.096986000                |
| 1                                            | 2.359868000  | -1.350625000 | 0.769015000                 |
| 1                                            | 2.106311000  | -2.868768000 | -0.130629000                |
| 1                                            | 2.252567000  | -1.319534000 | -1.000021000                |
| Zero-point correction=                       |              |              | 0.156851 (Hartree/Particle) |
| Thermal correction to Energy=                |              |              | 0.167405                    |
| Thermal correction to Enthalpy=              |              |              | 0.168349                    |
| Thermal correction to Gibbs Free Energy=     |              |              | 0.120539                    |
| Sum of electronic and zero-point Energies=   |              |              | -477.658570                 |
| Sum of electronic and thermal Energies=      |              |              | -477.648016                 |
| Sum of electronic and thermal Enthalpies=    |              |              | -477.647072                 |
| Sum of electronic and thermal Free Energies= |              |              | -477.694882                 |
| Electronic energy at ROCBS-QB3=              |              |              | -477.227123                 |

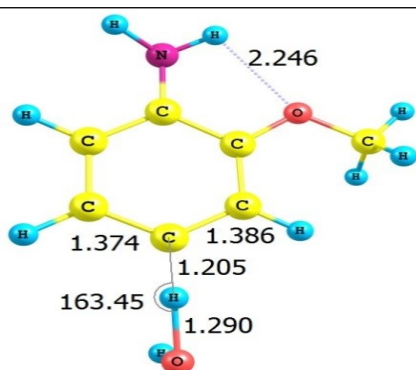

TS11

|                                              |              |              |                             |
|----------------------------------------------|--------------|--------------|-----------------------------|
| 6                                            | -1.434816000 | -1.453426000 | -0.083099000                |
| 6                                            | -1.594054000 | -0.089887000 | -0.128123000                |
| 6                                            | -0.140056000 | -1.963943000 | -0.011804000                |
| 1                                            | -2.701251000 | 0.376455000  | -0.225440000                |
| 1                                            | 0.018511000  | -3.034741000 | 0.021116000                 |
| 6                                            | -0.525277000 | 0.791588000  | -0.079170000                |
| 6                                            | 0.962531000  | -1.122031000 | 0.027210000                 |
| 1                                            | -0.698278000 | 1.856946000  | -0.111130000                |
| 6                                            | 0.756487000  | 0.270987000  | -0.009387000                |
| 1                                            | -2.286132000 | -2.118357000 | -0.111700000                |
| 8                                            | -3.847124000 | 0.906797000  | 0.038315000                 |
| 1                                            | -3.844269000 | 0.799286000  | 1.000341000                 |
| 7                                            | 2.257911000  | -1.601621000 | 0.156298000                 |
| 1                                            | 2.412017000  | -2.535093000 | -0.185969000                |
| 1                                            | 2.978538000  | -0.949382000 | -0.107654000                |
| 8                                            | 1.895975000  | 1.014524000  | 0.018821000                 |
| 6                                            | 1.759064000  | 2.417408000  | -0.011567000                |
| 1                                            | 1.193324000  | 2.773644000  | 0.851940000                 |
| 1                                            | 2.764881000  | 2.824521000  | 0.021496000                 |
| 1                                            | 1.263201000  | 2.743325000  | -0.928522000                |
| Zero-point correction=                       |              |              | 0.156672 (Hartree/Particle) |
| Thermal correction to Energy=                |              |              | 0.167330                    |
| Thermal correction to Enthalpy=              |              |              | 0.168274                    |
| Thermal correction to Gibbs Free Energy=     |              |              | 0.119741                    |
| Sum of electronic and zero-point Energies=   |              |              | -477.658705                 |
| Sum of electronic and thermal Energies=      |              |              | -477.648047                 |
| Sum of electronic and thermal Enthalpies=    |              |              | -477.647102                 |
| Sum of electronic and thermal Free Energies= |              |              | -477.695636                 |
| Electronic energy at ROCBS-QB3=              |              |              | -477.227823                 |

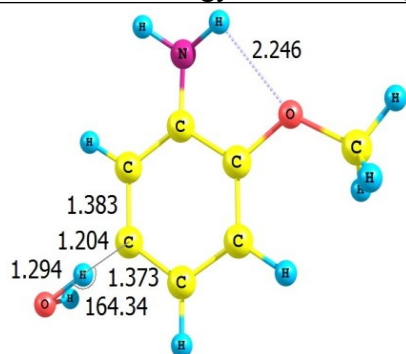

TS12

|                                              |              |              |                             |
|----------------------------------------------|--------------|--------------|-----------------------------|
| 6                                            | 1.033525000  | -1.407489000 | -0.093592000                |
| 6                                            | 1.735933000  | -0.227812000 | -0.123239000                |
| 6                                            | -0.361314000 | -1.337203000 | -0.039226000                |
| 1                                            | 2.935957000  | -0.264656000 | -0.207699000                |
| 1                                            | -0.937430000 | -2.250500000 | -0.029577000                |
| 6                                            | 1.128787000  | 1.013437000  | -0.073168000                |
| 6                                            | -0.996657000 | -0.109001000 | -0.000601000                |
| 6                                            | -0.257348000 | 1.090411000  | -0.013989000                |
| 1                                            | 1.534610000  | -2.363828000 | -0.122613000                |
| 8                                            | 4.203380000  | -0.273897000 | 0.051875000                 |
| 1                                            | 4.154854000  | -0.302453000 | 1.018442000                 |
| 7                                            | -0.932031000 | 2.296696000  | 0.083287000                 |
| 1                                            | -0.448580000 | 3.098801000  | -0.284222000                |
| 1                                            | -1.907151000 | 2.258458000  | -0.165785000                |
| 1                                            | 1.718779000  | 1.920954000  | -0.084942000                |
| 8                                            | -2.347158000 | 0.066433000  | 0.044992000                 |
| 6                                            | -3.156134000 | -1.087103000 | 0.062739000                 |
| 1                                            | -3.008086000 | -1.685132000 | -0.839315000                |
| 1                                            | -2.945179000 | -1.700150000 | 0.941668000                 |
| 1                                            | -4.184093000 | -0.740088000 | 0.102551000                 |
| Zero-point correction=                       |              |              | 0.156616 (Hartree/Particle) |
| Thermal correction to Energy=                |              |              | 0.167308                    |
| Thermal correction to Enthalpy=              |              |              | 0.168252                    |
| Thermal correction to Gibbs Free Energy=     |              |              | 0.119571                    |
| Sum of electronic and zero-point Energies=   |              |              | -477.658656                 |
| Sum of electronic and thermal Energies=      |              |              | -477.647964                 |
| Sum of electronic and thermal Enthalpies=    |              |              | -477.647020                 |
| Sum of electronic and thermal Free Energies= |              |              | -477.695701                 |
| Electronic energy at ROCBS-QB3=              |              |              | -477.227502                 |

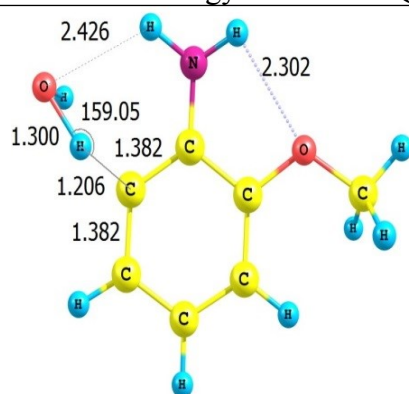

TS13

|   |              |              |              |
|---|--------------|--------------|--------------|
| 6 | -1.197102000 | 1.782555000  | -0.042655000 |
| 6 | -1.414008000 | 0.417960000  | -0.084636000 |
| 6 | 0.111368000  | 2.232425000  | 0.009437000  |
| 1 | -2.531480000 | -0.024680000 | -0.182333000 |
| 1 | 0.322701000  | 3.291950000  | 0.031107000  |
| 6 | -0.407938000 | -0.528378000 | -0.045408000 |
| 6 | 1.164491000  | 1.317064000  | 0.025205000  |
| 6 | 0.915487000  | -0.043721000 | -0.003601000 |

|                                              |              |              |                             |
|----------------------------------------------|--------------|--------------|-----------------------------|
| 1                                            | -2.026538000 | 2.474665000  | -0.066268000                |
| 8                                            | -3.548364000 | -0.808478000 | 0.019063000                 |
| 1                                            | -3.509352000 | -0.845819000 | 0.986616000                 |
| 1                                            | 2.180527000  | 1.680714000  | 0.060964000                 |
| 7                                            | -0.653041000 | -1.885962000 | 0.000671000                 |
| 1                                            | -1.566888000 | -2.166999000 | -0.319498000                |
| 1                                            | 0.109913000  | -2.472662000 | -0.293584000                |
| 8                                            | 1.867772000  | -1.016287000 | 0.004012000                 |
| 6                                            | 3.216107000  | -0.607982000 | 0.045653000                 |
| 1                                            | 3.424450000  | -0.036662000 | 0.952870000                 |
| 1                                            | 3.811456000  | -1.515844000 | 0.045230000                 |
| 1                                            | 3.470804000  | -0.004351000 | -0.828375000                |
| Zero-point correction=                       |              |              | 0.157187 (Hartree/Particle) |
| Thermal correction to Energy=                |              |              | 0.167641                    |
| Thermal correction to Enthalpy=              |              |              | 0.168585                    |
| Thermal correction to Gibbs Free Energy=     |              |              | 0.120864                    |
| Sum of electronic and zero-point Energies=   |              |              | -477.660838                 |
| Sum of electronic and thermal Energies=      |              |              | -477.650385                 |
| Sum of electronic and thermal Enthalpies=    |              |              | -477.649440                 |
| Sum of electronic and thermal Free Energies= |              |              | -477.697161                 |
| Electronic energy at ROCBS-QB3=              |              |              | -477.230151                 |

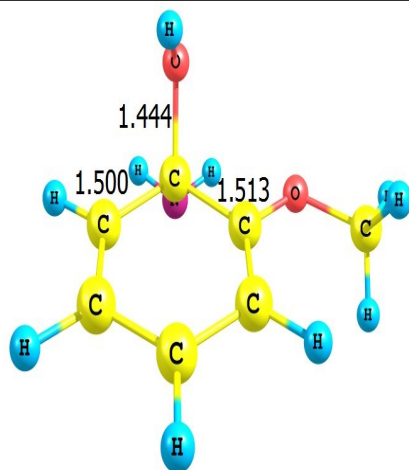

|    |              |              |              |
|----|--------------|--------------|--------------|
| P1 |              |              |              |
| 6  | -0.554808000 | 0.203474000  | -0.017600000 |
| 6  | -0.292547000 | 1.541193000  | 0.018116000  |
| 6  | 0.531645000  | -0.848758000 | -0.006258000 |
| 1  | -1.101325000 | 2.255539000  | 0.060337000  |
| 6  | 1.035794000  | 2.009249000  | -0.019173000 |
| 6  | 1.893968000  | -0.239116000 | -0.153551000 |
| 1  | 1.227589000  | 3.071155000  | 0.011612000  |
| 6  | 2.110694000  | 1.095658000  | -0.120046000 |
| 1  | 3.121330000  | 1.476569000  | -0.182284000 |
| 1  | 2.710443000  | -0.945190000 | -0.239798000 |
| 7  | 0.283098000  | -1.793725000 | -1.060878000 |
| 1  | 0.981403000  | -2.526809000 | -1.026864000 |
| 1  | -0.627686000 | -2.217552000 | -0.926553000 |
| 8  | 0.470498000  | -1.556814000 | 1.251043000  |
| 1  | 0.737921000  | -0.953674000 | 1.951605000  |

|                                              |              |              |                             |
|----------------------------------------------|--------------|--------------|-----------------------------|
| 8                                            | -1.773769000 | -0.355095000 | -0.029588000                |
| 6                                            | -2.896485000 | 0.500454000  | -0.023092000                |
| 1                                            | -2.914793000 | 1.106864000  | 0.884569000                 |
| 1                                            | -2.889433000 | 1.153630000  | -0.897750000                |
| 1                                            | -3.770531000 | -0.142101000 | -0.050734000                |
| Zero-point correction=                       |              |              | 0.165273 (Hartree/Particle) |
| Thermal correction to Energy=                |              |              | 0.175029                    |
| Thermal correction to Enthalpy=              |              |              | 0.175973                    |
| Thermal correction to Gibbs Free Energy=     |              |              | 0.130282                    |
| Sum of electronic and zero-point Energies=   |              |              | -477.694433                 |
| Sum of electronic and thermal Energies=      |              |              | -477.684677                 |
| Sum of electronic and thermal Enthalpies=    |              |              | -477.683733                 |
| Sum of electronic and thermal Free Energies= |              |              | -477.729424                 |
| Electronic energy at ROCBS-QB3= -477.273915  |              |              |                             |

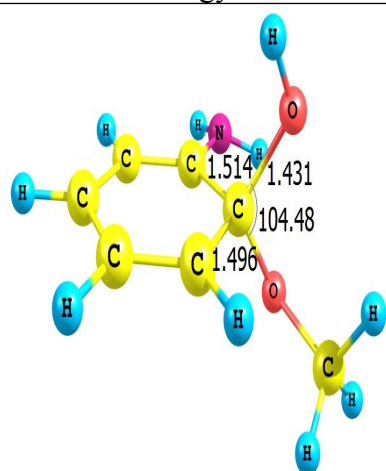

P2

|                               |              |              |                             |
|-------------------------------|--------------|--------------|-----------------------------|
| 6                             | 0.438811000  | -0.040303000 | 0.232632000                 |
| 6                             | -0.099703000 | -1.436259000 | 0.214390000                 |
| 6                             | -0.627132000 | 0.990993000  | -0.069916000                |
| 1                             | 0.609148000  | -2.222727000 | 0.435778000                 |
| 6                             | -1.406393000 | -1.712138000 | -0.003384000                |
| 6                             | -1.943691000 | 0.643607000  | -0.279905000                |
| 1                             | -1.742486000 | -2.740582000 | 0.021772000                 |
| 6                             | -2.352526000 | -0.686426000 | -0.256537000                |
| 1                             | -3.388017000 | -0.937703000 | -0.430240000                |
| 1                             | -2.663156000 | 1.430391000  | -0.471913000                |
| 7                             | -0.178645000 | 2.272286000  | -0.065823000                |
| 1                             | -0.761034000 | 2.998744000  | -0.443085000                |
| 1                             | 0.816966000  | 2.412712000  | -0.115712000                |
| 8                             | 1.042264000  | 0.239309000  | 1.499654000                 |
| 1                             | 0.440202000  | -0.058486000 | 2.186888000                 |
| 8                             | 1.460458000  | 0.203906000  | -0.705574000                |
| 6                             | 2.553623000  | -0.692937000 | -0.675306000                |
| 1                             | 2.915561000  | -0.838784000 | 0.342789000                 |
| 1                             | 2.284796000  | -1.655040000 | -1.115545000                |
| 1                             | 3.338825000  | -0.239465000 | -1.274456000                |
| Zero-point correction=        |              |              | 0.164729 (Hartree/Particle) |
| Thermal correction to Energy= |              |              | 0.174749                    |

|                                              |             |
|----------------------------------------------|-------------|
| Thermal correction to Enthalpy=              | 0.175693    |
| Thermal correction to Gibbs Free Energy=     | 0.129348    |
| Sum of electronic and zero-point Energies=   | -477.703118 |
| Sum of electronic and thermal Energies=      | -477.693098 |
| Sum of electronic and thermal Enthalpies=    | -477.692154 |
| Sum of electronic and thermal Free Energies= | -477.738499 |
| Electronic energy at ROCBS-QB3=              | -477.279965 |

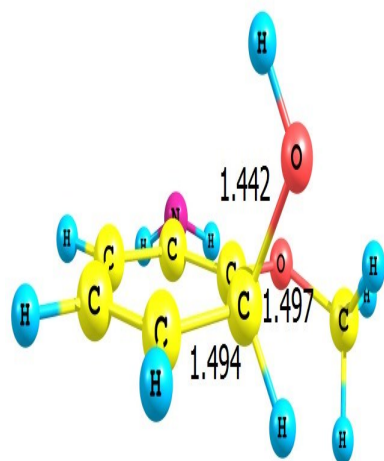

P3

|                                              |                             |              |              |
|----------------------------------------------|-----------------------------|--------------|--------------|
| 6                                            | 0.343883000                 | 0.282688000  | -0.080767000 |
| 6                                            | 0.236466000                 | -1.203938000 | -0.217210000 |
| 6                                            | -0.750847000                | 1.115061000  | 0.066620000  |
| 1                                            | 0.833126000                 | -1.542761000 | -1.071077000 |
| 6                                            | -1.177042000                | -1.660660000 | -0.377559000 |
| 6                                            | -2.035359000                | 0.574657000  | -0.016442000 |
| 1                                            | -1.322266000                | -2.718119000 | -0.549971000 |
| 6                                            | -2.220175000                | -0.813125000 | -0.254512000 |
| 1                                            | -3.230364000                | -1.192317000 | -0.337265000 |
| 1                                            | -2.890739000                | 1.224543000  | 0.106789000  |
| 7                                            | -0.552043000                | 2.469844000  | 0.346532000  |
| 1                                            | -1.277362000                | 3.074583000  | -0.004177000 |
| 1                                            | 0.370438000                 | 2.800751000  | 0.110219000  |
| 8                                            | 0.872685000                 | -1.863321000 | 0.895829000  |
| 1                                            | 0.326991000                 | -1.700241000 | 1.671728000  |
| 8                                            | 1.559198000                 | 0.871430000  | 0.005674000  |
| 6                                            | 2.702060000                 | 0.157221000  | -0.438810000 |
| 1                                            | 2.823019000                 | -0.772393000 | 0.114033000  |
| 1                                            | 2.632438000                 | -0.049726000 | -1.508749000 |
| 1                                            | 3.550045000                 | 0.810482000  | -0.257194000 |
| Zero-point correction=                       | 0.165306 (Hartree/Particle) |              |              |
| Thermal correction to Energy=                | 0.175251                    |              |              |
| Thermal correction to Enthalpy=              | 0.176196                    |              |              |
| Thermal correction to Gibbs Free Energy=     | 0.130158                    |              |              |
| Sum of electronic and zero-point Energies=   | -477.691138                 |              |              |
| Sum of electronic and thermal Energies=      | -477.681192                 |              |              |
| Sum of electronic and thermal Enthalpies=    | -477.680248                 |              |              |
| Sum of electronic and thermal Free Energies= | -477.726285                 |              |              |
| Electronic energy at ROCBS-QB3=              | -477.269597                 |              |              |

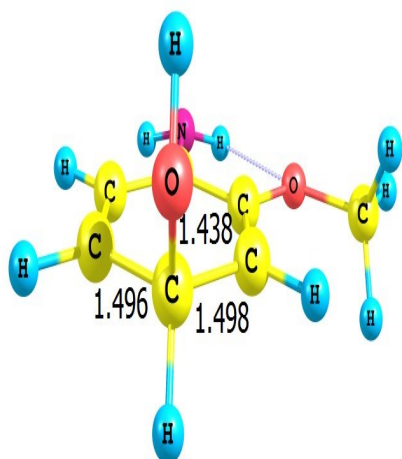

P4

|                                              |              |              |                             |
|----------------------------------------------|--------------|--------------|-----------------------------|
| 6                                            | 0.687039000  | -0.127292000 | -0.075846000                |
| 6                                            | -0.273262000 | -1.052568000 | -0.292624000                |
| 6                                            | 0.377673000  | 1.268943000  | 0.029103000                 |
| 1                                            | -0.033280000 | -2.101581000 | -0.379324000                |
| 6                                            | -1.725534000 | -0.696884000 | -0.378725000                |
| 6                                            | -0.969005000 | 1.671547000  | -0.104599000                |
| 1                                            | -2.153858000 | -1.109494000 | -1.297762000                |
| 6                                            | -1.964157000 | 0.778979000  | -0.324049000                |
| 1                                            | -2.988779000 | 1.109583000  | -0.424593000                |
| 1                                            | -1.194966000 | 2.729084000  | -0.027659000                |
| 7                                            | 1.385717000  | 2.158022000  | 0.306470000                 |
| 1                                            | 1.227358000  | 3.126529000  | 0.087679000                 |
| 1                                            | 2.326864000  | 1.827649000  | 0.171625000                 |
| 8                                            | -2.481341000 | -1.371891000 | 0.641990000                 |
| 1                                            | -2.162160000 | -1.049462000 | 1.490155000                 |
| 8                                            | 2.019001000  | -0.386631000 | 0.049985000                 |
| 6                                            | 2.425068000  | -1.733435000 | -0.039835000                |
| 1                                            | 1.955540000  | -2.334148000 | 0.741740000                 |
| 1                                            | 2.172346000  | -2.152517000 | -1.016056000                |
| 1                                            | 3.502702000  | -1.739362000 | 0.092548000                 |
| Zero-point correction=                       |              |              | 0.165654 (Hartree/Particle) |
| Thermal correction to Energy=                |              |              | 0.175549                    |
| Thermal correction to Enthalpy=              |              |              | 0.176493                    |
| Thermal correction to Gibbs Free Energy=     |              |              | 0.130368                    |
| Sum of electronic and zero-point Energies=   |              |              | -477.697965                 |
| Sum of electronic and thermal Energies=      |              |              | -477.688070                 |
| Sum of electronic and thermal Enthalpies=    |              |              | -477.687126                 |
| Sum of electronic and thermal Free Energies= |              |              | -477.733251                 |
| Electronic energy at ROCBS-QB3=              |              |              | -477.275488                 |

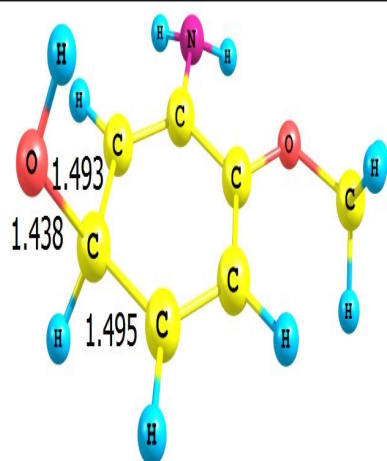

P5

|                                              |              |              |                             |
|----------------------------------------------|--------------|--------------|-----------------------------|
| 6                                            | 0.839376000  | -0.090914000 | -0.038335000                |
| 6                                            | 0.225596000  | -1.348267000 | -0.150386000                |
| 6                                            | 0.050260000  | 1.110789000  | -0.089459000                |
| 1                                            | 0.827431000  | -2.244468000 | -0.100625000                |
| 6                                            | -1.121449000 | -1.456961000 | -0.318727000                |
| 6                                            | -1.288262000 | 1.024091000  | -0.271424000                |
| 1                                            | -1.588308000 | -2.429633000 | -0.389556000                |
| 6                                            | -2.028175000 | -0.269418000 | -0.365385000                |
| 1                                            | -2.617593000 | -0.298533000 | -1.288843000                |
| 1                                            | -1.883802000 | 1.928088000  | -0.311700000                |
| 7                                            | 0.721864000  | 2.314250000  | 0.105330000                 |
| 1                                            | 0.247445000  | 3.125877000  | -0.254154000                |
| 1                                            | 1.702353000  | 2.292165000  | -0.123227000                |
| 8                                            | -3.042175000 | -0.367799000 | 0.649343000                 |
| 1                                            | -2.599894000 | -0.287225000 | 1.499686000                 |
| 8                                            | 2.167911000  | 0.109012000  | 0.109912000                 |
| 6                                            | 3.011198000  | -1.021587000 | 0.167622000                 |
| 1                                            | 2.756685000  | -1.653689000 | 1.020223000                 |
| 1                                            | 2.944045000  | -1.605804000 | -0.752070000                |
| 1                                            | 4.021437000  | -0.642618000 | 0.285480000                 |
| Zero-point correction=                       |              |              | 0.165405 (Hartree/Particle) |
| Thermal correction to Energy=                |              |              | 0.175334                    |
| Thermal correction to Enthalpy=              |              |              | 0.176278                    |
| Thermal correction to Gibbs Free Energy=     |              |              | 0.129984                    |
| Sum of electronic and zero-point Energies=   |              |              | -477.692157                 |
| Sum of electronic and thermal Energies=      |              |              | -477.682228                 |
| Sum of electronic and thermal Enthalpies=    |              |              | -477.681284                 |
| Sum of electronic and thermal Free Energies= |              |              | -477.727578                 |
| Electronic energy at ROCBS-QB3=              |              |              | -477.270087                 |



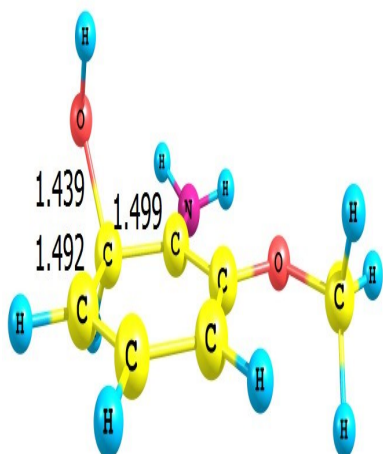

P6

|                                              |              |              |                             |
|----------------------------------------------|--------------|--------------|-----------------------------|
| 6                                            | -0.814672000 | 0.049566000  | -0.058132000                |
| 6                                            | -0.730700000 | 1.429219000  | 0.019331000                 |
| 6                                            | 0.325730000  | -0.732214000 | -0.210729000                |
| 1                                            | -1.610247000 | 2.037863000  | 0.151704000                 |
| 6                                            | 0.553528000  | 2.049252000  | -0.051948000                |
| 6                                            | 1.698770000  | -0.141869000 | -0.320514000                |
| 1                                            | 0.601155000  | 3.127948000  | 0.022016000                 |
| 6                                            | 1.692453000  | 1.345610000  | -0.209709000                |
| 1                                            | 2.653689000  | 1.837383000  | -0.271613000                |
| 1                                            | 2.133613000  | -0.455498000 | -1.278834000                |
| 7                                            | 0.245898000  | -2.089201000 | -0.312559000                |
| 1                                            | 1.077496000  | -2.603778000 | -0.069849000                |
| 1                                            | -0.633209000 | -2.517598000 | -0.073820000                |
| 8                                            | 2.582488000  | -0.757730000 | 0.633514000                 |
| 1                                            | 2.364759000  | -0.394754000 | 1.497982000                 |
| 8                                            | -1.976400000 | -0.668391000 | 0.023350000                 |
| 6                                            | -3.172452000 | 0.054138000  | 0.200934000                 |
| 1                                            | -3.153721000 | 0.623835000  | 1.132758000                 |
| 1                                            | -3.347616000 | 0.735554000  | -0.634385000                |
| 1                                            | -3.971861000 | -0.679790000 | 0.241650000                 |
| Zero-point correction=                       |              |              | 0.165842 (Hartree/Particle) |
| Thermal correction to Energy=                |              |              | 0.175650                    |
| Thermal correction to Enthalpy=              |              |              | 0.176594                    |
| Thermal correction to Gibbs Free Energy=     |              |              | 0.130582                    |
| Sum of electronic and zero-point Energies=   |              |              | -477.698776                 |
| Sum of electronic and thermal Energies=      |              |              | -477.688967                 |
| Sum of electronic and thermal Enthalpies=    |              |              | -477.688023                 |
| Sum of electronic and thermal Free Energies= |              |              | -477.734035                 |
| Electronic energy at ROCBS-QB3=              |              |              | -477.276139                 |

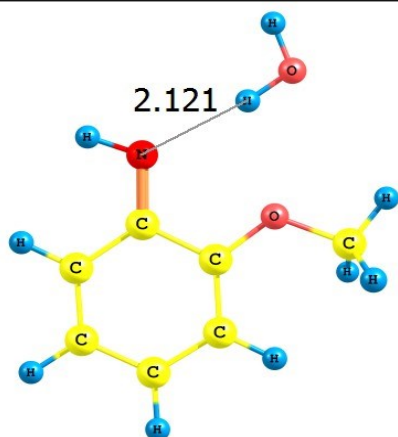

P7---H<sub>2</sub>O

|                                              |              |              |                             |
|----------------------------------------------|--------------|--------------|-----------------------------|
| 6                                            | 2.483334000  | 0.909387000  | 0.001700000                 |
| 6                                            | 2.800078000  | -0.456872000 | 0.001100000                 |
| 6                                            | 1.161691000  | 1.340126000  | 0.000693000                 |
| 1                                            | 3.835257000  | -0.767561000 | 0.001806000                 |
| 1                                            | 0.940465000  | 2.396820000  | 0.001014000                 |
| 6                                            | 1.799143000  | -1.390338000 | -0.000306000                |
| 6                                            | 0.134370000  | 0.410379000  | -0.000892000                |
| 6                                            | 0.420451000  | -1.009939000 | -0.001097000                |
| 1                                            | 3.277343000  | 1.643039000  | 0.002884000                 |
| 7                                            | -0.599856000 | -1.842093000 | -0.001769000                |
| 1                                            | -2.565117000 | -1.044744000 | -0.000848000                |
| 1                                            | -0.262599000 | -2.803788000 | -0.002055000                |
| 8                                            | -3.501644000 | -0.794420000 | 0.000590000                 |
| 1                                            | -3.983751000 | -1.621302000 | 0.019506000                 |
| 1                                            | 2.027220000  | -2.448969000 | -0.000694000                |
| 8                                            | -1.159000000 | 0.702832000  | -0.002308000                |
| 6                                            | -1.578986000 | 2.051434000  | -0.000456000                |
| 1                                            | -2.663325000 | 2.013650000  | -0.000884000                |
| 1                                            | -1.221261000 | 2.566212000  | 0.893209000                 |
| 1                                            | -1.220572000 | 2.568939000  | -0.892269000                |
| Zero-point correction=                       |              |              | 0.162213 (Hartree/Particle) |
| Thermal correction to Energy=                |              |              | 0.173709                    |
| Thermal correction to Enthalpy=              |              |              | 0.174653                    |
| Thermal correction to Gibbs Free Energy=     |              |              | 0.122715                    |
| Sum of electronic and zero-point Energies=   |              |              | -477.713422                 |
| Sum of electronic and thermal Energies=      |              |              | -477.701926                 |
| Sum of electronic and thermal Enthalpies=    |              |              | -477.700982                 |
| Sum of electronic and thermal Free Energies= |              |              | -477.752920                 |
| Electronic energy at ROCBS-QB3=              |              |              | -477.291938                 |

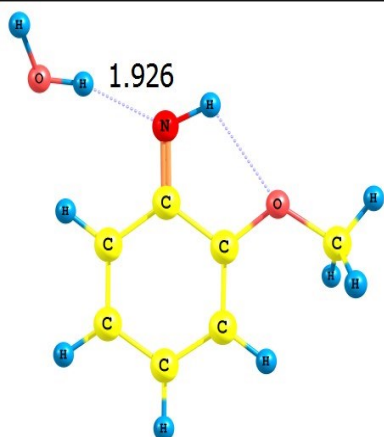

P8---H<sub>2</sub>O

|                                              |              |              |                             |
|----------------------------------------------|--------------|--------------|-----------------------------|
| 6                                            | -0.846888000 | 2.221254000  | -0.000831000                |
| 6                                            | -1.595553000 | 1.045135000  | -0.002549000                |
| 6                                            | 0.552161000  | 2.189381000  | 0.006492000                 |
| 1                                            | -2.673524000 | 1.101320000  | -0.009035000                |
| 1                                            | 1.110086000  | 3.114875000  | 0.006321000                 |
| 6                                            | -0.950634000 | -0.176010000 | 0.003221000                 |
| 6                                            | 1.211316000  | 0.988328000  | 0.012619000                 |
| 1                                            | 2.292156000  | 0.926331000  | 0.017854000                 |
| 6                                            | 0.493898000  | -0.248026000 | 0.011943000                 |
| 1                                            | -1.363757000 | 3.170848000  | -0.005858000                |
| 7                                            | 1.156037000  | -1.387353000 | 0.015650000                 |
| 1                                            | 3.070636000  | -1.188297000 | -0.039019000                |
| 1                                            | 0.508293000  | -2.173214000 | 0.009340000                 |
| 8                                            | 3.966207000  | -0.809736000 | -0.083961000                |
| 1                                            | 4.512331000  | -1.360261000 | 0.477382000                 |
| 8                                            | -1.568738000 | -1.368134000 | 0.001724000                 |
| 6                                            | -2.981897000 | -1.389995000 | -0.009496000                |
| 1                                            | -3.384071000 | -0.899517000 | 0.878613000                 |
| 1                                            | -3.369756000 | -0.901710000 | -0.905120000                |
| 1                                            | -3.268836000 | -2.436347000 | -0.010528000                |
| Zero-point correction=                       |              |              | 0.162988 (Hartree/Particle) |
| Thermal correction to Energy=                |              |              | 0.173991                    |
| Thermal correction to Enthalpy=              |              |              | 0.174935                    |
| Thermal correction to Gibbs Free Energy=     |              |              | 0.125176                    |
| Sum of electronic and zero-point Energies=   |              |              | -477.716124                 |
| Sum of electronic and thermal Energies=      |              |              | -477.705121                 |
| Sum of electronic and thermal Enthalpies=    |              |              | -477.704176                 |
| Sum of electronic and thermal Free Energies= |              |              | -477.753936                 |
| Electronic energy at ROCBS-QB3=              |              |              | -477.296430                 |

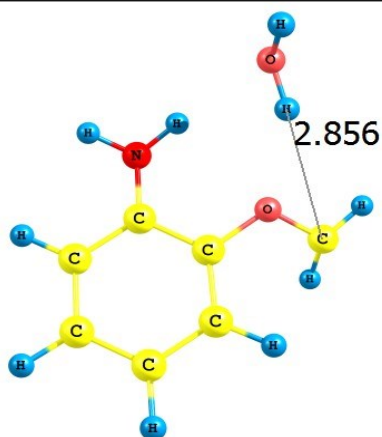

P9---H<sub>2</sub>O

|                                              |              |              |                             |
|----------------------------------------------|--------------|--------------|-----------------------------|
| 6                                            | 2.450819000  | 0.835324000  | 0.434576000                 |
| 6                                            | 1.150294000  | 1.309297000  | 0.319386000                 |
| 6                                            | 2.704223000  | -0.507647000 | 0.202108000                 |
| 1                                            | 0.916591000  | 2.347041000  | 0.514812000                 |
| 1                                            | 3.710745000  | -0.893086000 | 0.288529000                 |
| 6                                            | 0.129217000  | 0.446486000  | -0.031751000                |
| 6                                            | 1.673100000  | -1.369552000 | -0.136505000                |
| 1                                            | 1.877804000  | -2.416987000 | -0.319761000                |
| 6                                            | 0.359387000  | -0.916577000 | -0.261452000                |
| 1                                            | 3.248678000  | 1.509301000  | 0.710044000                 |
| 1                                            | -2.723171000 | -0.046966000 | 0.707224000                 |
| 7                                            | -0.666978000 | -1.751120000 | -0.660420000                |
| 1                                            | -0.474361000 | -2.734613000 | -0.570794000                |
| 1                                            | -1.605038000 | -1.505363000 | -0.375107000                |
| 8                                            | -3.310015000 | -0.811272000 | 0.696307000                 |
| 1                                            | -3.523722000 | -0.997073000 | 1.611693000                 |
| 8                                            | -1.181501000 | 0.869844000  | -0.152074000                |
| 6                                            | -1.413536000 | 2.134671000  | -0.589046000                |
| 1                                            | -2.462660000 | 2.369760000  | -0.660257000                |
| 1                                            | -0.684913000 | 2.565235000  | -1.261198000                |
| Zero-point correction=                       |              |              | 0.161463 (Hartree/Particle) |
| Thermal correction to Energy=                |              |              | 0.173102                    |
| Thermal correction to Enthalpy=              |              |              | 0.174046                    |
| Thermal correction to Gibbs Free Energy=     |              |              | 0.123444                    |
| Sum of electronic and zero-point Energies=   |              |              | -477.703398                 |
| Sum of electronic and thermal Energies=      |              |              | -477.691758                 |
| Sum of electronic and thermal Enthalpies=    |              |              | -477.690814                 |
| Sum of electronic and thermal Free Energies= |              |              | -477.741417                 |
| Electronic energy at ROCBS-QB3=              |              |              | -477.277420                 |

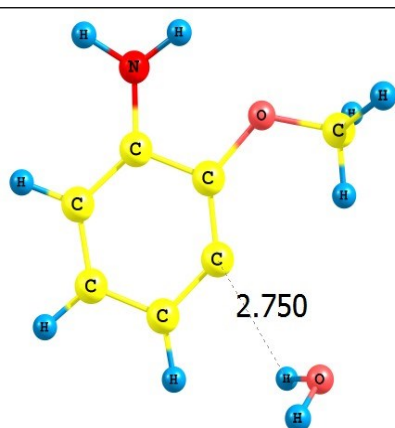

P10---H<sub>2</sub>O

|                                              |              |              |                             |
|----------------------------------------------|--------------|--------------|-----------------------------|
| 6                                            | 0.071551000  | 1.990858000  | 0.054693000                 |
| 6                                            | -0.479016000 | 0.733245000  | 0.047668000                 |
| 6                                            | 1.461085000  | 2.047115000  | 0.018182000                 |
| 1                                            | -4.225689000 | 1.550391000  | -0.147251000                |
| 1                                            | 1.960355000  | 3.006284000  | 0.021205000                 |
| 6                                            | 0.205942000  | -0.450956000 | 0.012015000                 |
| 6                                            | 2.213276000  | 0.879219000  | -0.024386000                |
| 6                                            | 1.612976000  | -0.376192000 | -0.029862000                |
| 1                                            | -0.530533000 | 2.887823000  | 0.087033000                 |
| 8                                            | -3.756877000 | 0.718809000  | -0.060065000                |
| 1                                            | -2.822278000 | 0.943307000  | -0.107642000                |
| 1                                            | 3.293667000  | 0.935534000  | -0.060678000                |
| 7                                            | 2.336881000  | -1.553796000 | -0.122689000                |
| 1                                            | 3.281027000  | -1.516977000 | 0.223253000                 |
| 1                                            | 1.834181000  | -2.383009000 | 0.150498000                 |
| 8                                            | -0.339620000 | -1.690251000 | 0.025895000                 |
| 6                                            | -1.756586000 | -1.737959000 | 0.052975000                 |
| 1                                            | -2.176623000 | -1.271209000 | -0.839443000                |
| 1                                            | -2.028806000 | -2.788172000 | 0.082049000                 |
| 1                                            | -2.146861000 | -1.227849000 | 0.935450000                 |
| Zero-point correction=                       |              |              | 0.161621 (Hartree/Particle) |
| Thermal correction to Energy=                |              |              | 0.173895                    |
| Thermal correction to Enthalpy=              |              |              | 0.174839                    |
| Thermal correction to Gibbs Free Energy=     |              |              | 0.121884                    |
| Sum of electronic and zero-point Energies=   |              |              | -477.678908                 |
| Sum of electronic and thermal Energies=      |              |              | -477.666634                 |
| Sum of electronic and thermal Enthalpies=    |              |              | -477.665690                 |
| Sum of electronic and thermal Free Energies= |              |              | -477.718644                 |
| Electronic energy at ROCBS-QB3=              |              |              | -477.250630                 |

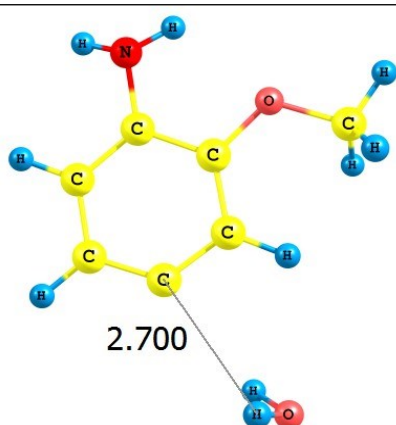

P11---H<sub>2</sub>O

|                                              |              |              |                             |
|----------------------------------------------|--------------|--------------|-----------------------------|
| 6                                            | -0.494162000 | -2.175029000 | 0.004882000                 |
| 6                                            | -1.267829000 | -1.052114000 | 0.002260000                 |
| 6                                            | 0.890071000  | -1.977988000 | -0.001698000                |
| 1                                            | -3.710637000 | -0.189355000 | -0.757453000                |
| 1                                            | 1.556252000  | -2.832145000 | -0.009670000                |
| 6                                            | -0.802710000 | 0.243139000  | -0.001739000                |
| 6                                            | 1.437208000  | -0.702579000 | -0.008571000                |
| 1                                            | -1.483868000 | 1.082162000  | 0.001344000                 |
| 6                                            | 0.576545000  | 0.413144000  | -0.005838000                |
| 1                                            | -0.910252000 | -3.172492000 | 0.009631000                 |
| 8                                            | -4.069922000 | 0.272716000  | 0.003962000                 |
| 1                                            | -3.708066000 | -0.204967000 | 0.754449000                 |
| 7                                            | 2.809523000  | -0.486079000 | -0.074249000                |
| 1                                            | 3.378686000  | -1.222064000 | 0.309516000                 |
| 1                                            | 3.100805000  | 0.433798000  | 0.215532000                 |
| 8                                            | 1.205622000  | 1.618178000  | 0.000698000                 |
| 6                                            | 0.397011000  | 2.774300000  | 0.002562000                 |
| 1                                            | 1.074975000  | 3.622070000  | 0.004996000                 |
| 1                                            | -0.231695000 | 2.812288000  | -0.889292000                |
| 1                                            | -0.235261000 | 2.808867000  | 0.892268000                 |
| Zero-point correction=                       |              |              | 0.161821 (Hartree/Particle) |
| Thermal correction to Energy=                |              |              | 0.174055                    |
| Thermal correction to Enthalpy=              |              |              | 0.174999                    |
| Thermal correction to Gibbs Free Energy=     |              |              | 0.121870                    |
| Sum of electronic and zero-point Energies=   |              |              | -477.677043                 |
| Sum of electronic and thermal Energies=      |              |              | -477.664809                 |
| Sum of electronic and thermal Enthalpies=    |              |              | -477.663865                 |
| Sum of electronic and thermal Free Energies= |              |              | -477.716993                 |
| Electronic energy at ROCBS-QB3=              |              |              | -477.249055                 |

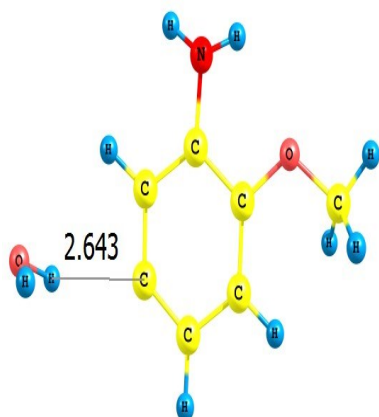

P12---H<sub>2</sub>O

|                                              |              |              |                             |
|----------------------------------------------|--------------|--------------|-----------------------------|
| 6                                            | 0.616357000  | -1.794719000 | 0.010120000                 |
| 6                                            | 1.532870000  | -0.785499000 | 0.016124000                 |
| 6                                            | -0.730741000 | -1.405170000 | 0.001490000                 |
| 1                                            | 4.076505000  | -0.254972000 | -0.794657000                |
| 1                                            | -1.499292000 | -2.164131000 | 0.001540000                 |
| 6                                            | 1.255861000  | 0.559104000  | 0.010247000                 |
| 6                                            | -1.072443000 | -0.064626000 | -0.004259000                |
| 6                                            | -0.084155000 | 0.941959000  | -0.003618000                |
| 1                                            | 0.889454000  | -2.839860000 | 0.013401000                 |
| 8                                            | 4.519703000  | 0.066881000  | -0.005973000                |
| 1                                            | 4.045526000  | -0.356991000 | 0.713641000                 |
| 7                                            | -0.476390000 | 2.266281000  | -0.067145000                |
| 1                                            | 0.186652000  | 2.941328000  | 0.273838000                 |
| 1                                            | -1.429231000 | 2.445406000  | 0.204562000                 |
| 1                                            | 2.040686000  | 1.305834000  | 0.010572000                 |
| 8                                            | -2.351031000 | 0.411030000  | -0.003004000                |
| 6                                            | -3.398288000 | -0.530857000 | -0.006409000                |
| 1                                            | -3.362188000 | -1.162887000 | 0.883969000                 |
| 1                                            | -4.322962000 | 0.038144000  | -0.009020000                |
| 1                                            | -3.356555000 | -1.160285000 | -0.898179000                |
| Zero-point correction=                       |              |              | 0.161679 (Hartree/Particle) |
| Thermal correction to Energy=                |              |              | 0.173982                    |
| Thermal correction to Enthalpy=              |              |              | 0.174926                    |
| Thermal correction to Gibbs Free Energy=     |              |              | 0.121247                    |
| Sum of electronic and zero-point Energies=   |              |              | -477.677314                 |
| Sum of electronic and thermal Energies=      |              |              | -477.665012                 |
| Sum of electronic and thermal Enthalpies=    |              |              | -477.664068                 |
| Sum of electronic and thermal Free Energies= |              |              | -477.717747                 |
| Electronic energy at ROCBS-QB3=              |              |              | -477.248650                 |

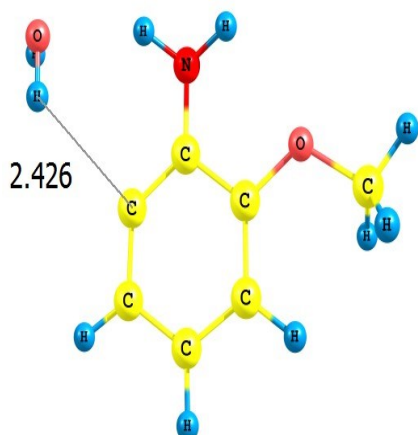

P13---H<sub>2</sub>O

|                                              |              |              |                             |
|----------------------------------------------|--------------|--------------|-----------------------------|
| 6                                            | 0.770669000  | 2.103161000  | -0.079560000                |
| 6                                            | 1.221128000  | 0.810705000  | -0.163499000                |
| 6                                            | -0.602331000 | 2.277889000  | 0.038144000                 |
| 1                                            | 3.396522000  | -0.008890000 | 0.530174000                 |
| 1                                            | -1.021293000 | 3.271713000  | 0.108724000                 |
| 6                                            | 0.461526000  | -0.334393000 | -0.153006000                |
| 6                                            | -1.444202000 | 1.166669000  | 0.067007000                 |
| 6                                            | -0.929275000 | -0.116820000 | -0.024395000                |
| 1                                            | 1.445197000  | 2.947885000  | -0.102199000                |
| 8                                            | 3.830942000  | -0.842568000 | 0.321618000                 |
| 1                                            | 4.264262000  | -0.690048000 | -0.520892000                |
| 1                                            | -2.509187000 | 1.314694000  | 0.162953000                 |
| 7                                            | 0.957689000  | -1.613186000 | -0.304127000                |
| 1                                            | 1.930407000  | -1.731415000 | -0.058443000                |
| 1                                            | 0.339431000  | -2.344151000 | 0.006507000                 |
| 8                                            | -1.670499000 | -1.258264000 | 0.003912000                 |
| 6                                            | -3.067900000 | -1.128169000 | 0.132503000                 |
| 1                                            | -3.488323000 | -0.570450000 | -0.707162000                |
| 1                                            | -3.470380000 | -2.136532000 | 0.134698000                 |
| 1                                            | -3.331690000 | -0.628107000 | 1.067126000                 |
| Zero-point correction=                       |              |              | 0.162517 (Hartree/Particle) |
| Thermal correction to Energy=                |              |              | 0.174448                    |
| Thermal correction to Enthalpy=              |              |              | 0.175392                    |
| Thermal correction to Gibbs Free Energy=     |              |              | 0.123075                    |
| Sum of electronic and zero-point Energies=   |              |              | -477.679917                 |
| Sum of electronic and thermal Energies=      |              |              | -477.667987                 |
| Sum of electronic and thermal Enthalpies=    |              |              | -477.667043                 |
| Sum of electronic and thermal Free Energies= |              |              | -477.719359                 |
| Electronic energy at ROCBS-QB3=              |              |              | -477.252944                 |



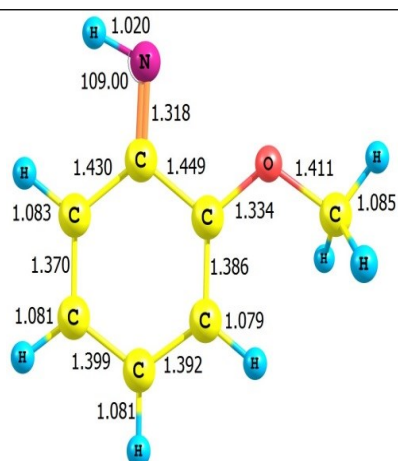

P7

|   |              |              |              |
|---|--------------|--------------|--------------|
| 6 | 2.220895000  | -0.741594000 | -0.000078000 |
| 6 | 1.891876000  | 0.588412000  | -0.000174000 |
| 6 | 1.207082000  | -1.705648000 | 0.000049000  |
| 1 | 2.663357000  | 1.348757000  | -0.000285000 |
| 1 | 1.462189000  | -2.756457000 | 0.000126000  |
| 6 | 0.532738000  | 1.034067000  | -0.000127000 |
| 6 | -0.134312000 | -1.334078000 | 0.000055000  |
| 1 | -0.893987000 | -2.100724000 | 0.000117000  |
| 6 | -0.488100000 | 0.005932000  | -0.000049000 |
| 1 | 3.257514000  | -1.048509000 | -0.000104000 |
| 8 | -1.745152000 | 0.451904000  | -0.000138000 |
| 6 | -2.793743000 | -0.492058000 | 0.000425000  |
| 1 | -2.755891000 | -1.121217000 | -0.891368000 |
| 1 | -2.755237000 | -1.120893000 | 0.892416000  |
| 1 | -3.713929000 | 0.083142000  | 0.000652000  |
| 7 | 0.156111000  | 2.297058000  | -0.000125000 |
| 1 | 0.985800000  | 2.891061000  | -0.000189000 |

Zero-point correction= 0.137813 (Hartree/Particle)

Thermal correction to Energy= 0.145505

Thermal correction to Enthalpy= 0.146450

Thermal correction to Gibbs Free Energy= 0.105077

Sum of electronic and zero-point Energies= -401.298012

Sum of electronic and thermal Energies= -401.290320

Sum of electronic and thermal Enthalpies= -401.289376

Sum of electronic and thermal Free Energies= -401.330749

Electronic energy at ROCBS-QB3= -400.919054

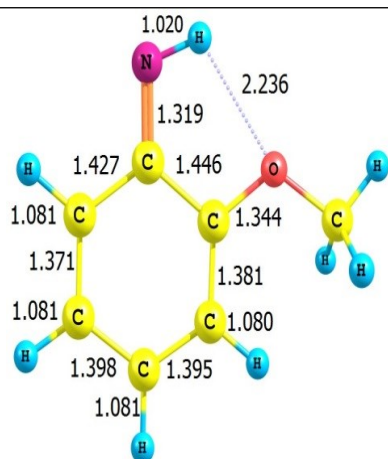

P8

|                                              |              |              |                             |
|----------------------------------------------|--------------|--------------|-----------------------------|
| 6                                            | -2.262553000 | -0.650092000 | 0.000022000                 |
| 6                                            | -1.882857000 | 0.667363000  | -0.000062000                |
| 6                                            | -1.289664000 | -1.654291000 | 0.000071000                 |
| 1                                            | -2.605657000 | 1.471660000  | -0.000108000                |
| 1                                            | -1.587326000 | -2.693881000 | 0.000136000                 |
| 6                                            | -0.508274000 | 1.050698000  | -0.000134000                |
| 6                                            | 0.069108000  | -1.339318000 | 0.000061000                 |
| 1                                            | 0.797523000  | -2.136280000 | 0.000106000                 |
| 6                                            | 0.467473000  | -0.016642000 | -0.000019000                |
| 1                                            | -3.310368000 | -0.916016000 | 0.000045000                 |
| 8                                            | 1.747066000  | 0.394332000  | -0.000043000                |
| 6                                            | 2.764796000  | -0.584686000 | 0.000194000                 |
| 1                                            | 2.702615000  | -1.211064000 | 0.892211000                 |
| 1                                            | 2.702833000  | -1.211268000 | -0.891695000                |
| 1                                            | 3.705573000  | -0.043601000 | 0.000247000                 |
| 7                                            | -0.193129000 | 2.331131000  | -0.000178000                |
| 1                                            | 0.822004000  | 2.429670000  | -0.000144000                |
| Zero-point correction=                       |              |              | 0.137871 (Hartree/Particle) |
| Thermal correction to Energy=                |              |              | 0.145565                    |
| Thermal correction to Enthalpy=              |              |              | 0.146509                    |
| Thermal correction to Gibbs Free Energy=     |              |              | 0.105139                    |
| Sum of electronic and zero-point Energies=   |              |              | -401.302651                 |
| Sum of electronic and thermal Energies=      |              |              | -401.294957                 |
| Sum of electronic and thermal Enthalpies=    |              |              | -401.294013                 |
| Sum of electronic and thermal Free Energies= |              |              | -401.335384                 |
| Electronic energy at ROCBS-QB3=              |              |              | -400.924244                 |

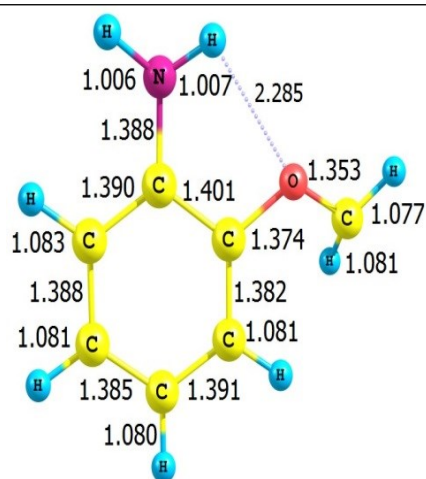

P9

|                                              |              |              |                             |
|----------------------------------------------|--------------|--------------|-----------------------------|
| 6                                            | 2.261245000  | -0.506882000 | 0.060945000                 |
| 6                                            | 1.732959000  | 0.776537000  | 0.079103000                 |
| 6                                            | 1.425243000  | -1.606776000 | -0.037289000                |
| 1                                            | 2.387691000  | 1.635311000  | 0.159558000                 |
| 1                                            | 1.831987000  | -2.607283000 | -0.063930000                |
| 6                                            | 0.360256000  | 0.985830000  | 0.005821000                 |
| 6                                            | 0.049816000  | -1.418101000 | -0.116781000                |
| 1                                            | -0.618933000 | -2.260056000 | -0.227368000                |
| 6                                            | -0.470966000 | -0.138002000 | -0.086884000                |
| 1                                            | 3.332361000  | -0.642139000 | 0.119661000                 |
| 8                                            | -1.813554000 | 0.138529000  | -0.184583000                |
| 6                                            | -2.708124000 | -0.813118000 | 0.169067000                 |
| 1                                            | -3.730075000 | -0.508170000 | 0.018870000                 |
| 1                                            | -2.427294000 | -1.496024000 | 0.959115000                 |
| 7                                            | -0.202554000 | 2.252173000  | 0.079479000                 |
| 1                                            | -1.144275000 | 2.321301000  | -0.270246000                |
| 1                                            | 0.392272000  | 3.006690000  | -0.219243000                |
| Zero-point correction=                       |              |              | 0.136622 (Hartree/Particle) |
| Thermal correction to Energy=                |              |              | 0.144866                    |
| Thermal correction to Enthalpy=              |              |              | 0.145810                    |
| Thermal correction to Gibbs Free Energy=     |              |              | 0.103552                    |
| Sum of electronic and zero-point Energies=   |              |              | -401.293949                 |
| Sum of electronic and thermal Energies=      |              |              | -401.285705                 |
| Sum of electronic and thermal Enthalpies=    |              |              | -401.284761                 |
| Sum of electronic and thermal Free Energies= |              |              | -401.327020                 |
| Electronic energy at ROCBS-QB3=              |              |              | -400.909498                 |

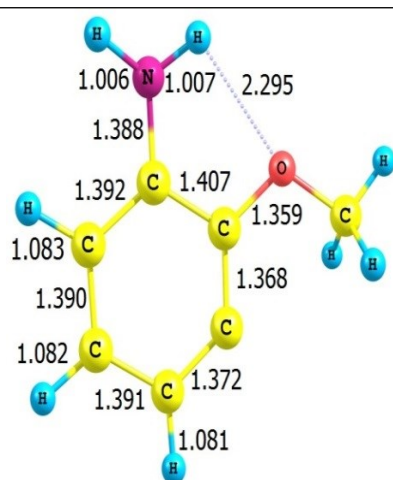

P10

|                                              |              |              |                             |
|----------------------------------------------|--------------|--------------|-----------------------------|
| 6                                            | -1.306108000 | -1.734395000 | 0.004148000                 |
| 6                                            | 0.013526000  | -1.357768000 | -0.003648000                |
| 6                                            | -2.237716000 | -0.700957000 | 0.008562000                 |
| 1                                            | -3.295040000 | -0.928877000 | 0.015571000                 |
| 6                                            | 0.479144000  | -0.071643000 | -0.008938000                |
| 6                                            | -1.821671000 | 0.625307000  | -0.000300000                |
| 1                                            | -2.555454000 | 1.421273000  | -0.006520000                |
| 6                                            | -0.472186000 | 0.965494000  | -0.011014000                |
| 1                                            | -1.609494000 | -2.771748000 | 0.005907000                 |
| 6                                            | 2.713991000  | -0.774340000 | 0.007498000                 |
| 1                                            | 3.703783000  | -0.328037000 | 0.022698000                 |
| 1                                            | 2.573223000  | -1.399640000 | 0.892113000                 |
| 1                                            | 2.597676000  | -1.391696000 | -0.885985000                |
| 7                                            | -0.029384000 | 2.279174000  | -0.074035000                |
| 1                                            | -0.656738000 | 2.968151000  | 0.306115000                 |
| 1                                            | 0.930573000  | 2.413400000  | 0.200581000                 |
| 8                                            | 1.787909000  | 0.294096000  | -0.001259000                |
| Zero-point correction=                       |              |              | 0.137676 (Hartree/Particle) |
| Thermal correction to Energy=                |              |              | 0.146073                    |
| Thermal correction to Enthalpy=              |              |              | 0.147017                    |
| Thermal correction to Gibbs Free Energy=     |              |              | 0.104034                    |
| Sum of electronic and zero-point Energies=   |              |              | -401.271874                 |
| Sum of electronic and thermal Energies=      |              |              | -401.263477                 |
| Sum of electronic and thermal Enthalpies=    |              |              | -401.262533                 |
| Sum of electronic and thermal Free Energies= |              |              | -401.305516                 |
| Electronic energy at ROCBS-QB3=              |              |              | -400.886939                 |

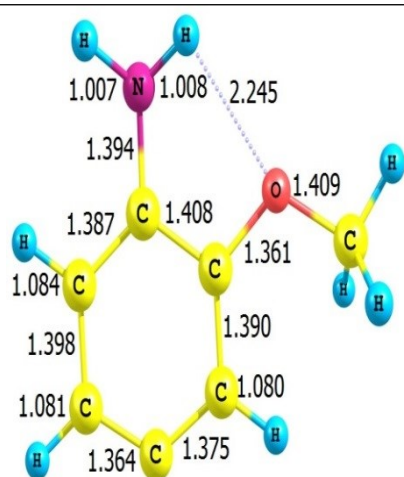

P11

|                                              |              |              |                             |
|----------------------------------------------|--------------|--------------|-----------------------------|
| 6                                            | -2.255995000 | -0.863095000 | 0.005999000                 |
| 6                                            | -1.906544000 | 0.490843000  | -0.003273000                |
| 6                                            | -1.229841000 | -1.761156000 | 0.005817000                 |
| 1                                            | -2.681080000 | 1.248441000  | -0.013935000                |
| 6                                            | -0.578707000 | 0.891768000  | -0.009885000                |
| 6                                            | 0.107524000  | -1.440149000 | 0.001689000                 |
| 1                                            | 0.872284000  | -2.203360000 | 0.006863000                 |
| 6                                            | 0.432031000  | -0.088187000 | -0.004800000                |
| 1                                            | -3.294072000 | -1.165088000 | 0.010805000                 |
| 8                                            | 1.701473000  | 0.403495000  | 0.001764000                 |
| 6                                            | 2.760049000  | -0.526472000 | 0.002018000                 |
| 1                                            | 2.728305000  | -1.158082000 | 0.892881000                 |
| 1                                            | 2.727975000  | -1.156353000 | -0.889806000                |
| 1                                            | 3.678001000  | 0.053539000  | 0.001923000                 |
| 7                                            | -0.210121000 | 2.233942000  | -0.077960000                |
| 1                                            | 0.734217000  | 2.417926000  | 0.221152000                 |
| 1                                            | -0.877667000 | 2.876114000  | 0.316326000                 |
| Zero-point correction=                       |              |              | 0.138312 (Hartree/Particle) |
| Thermal correction to Energy=                |              |              | 0.146340                    |
| Thermal correction to Enthalpy=              |              |              | 0.147285                    |
| Thermal correction to Gibbs Free Energy=     |              |              | 0.105448                    |
| Sum of electronic and zero-point Energies=   |              |              | -401.269162                 |
| Sum of electronic and thermal Energies=      |              |              | -401.261134                 |
| Sum of electronic and thermal Enthalpies=    |              |              | -401.260189                 |
| Sum of electronic and thermal Free Energies= |              |              | -401.302026                 |
| Electronic energy at ROCBS-QB3=              |              |              | -400.885599                 |

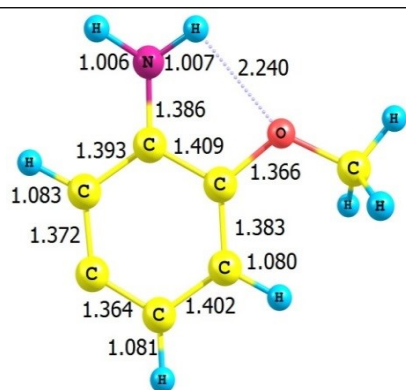

P12

|                                              |              |              |                             |
|----------------------------------------------|--------------|--------------|-----------------------------|
| 6                                            | -2.218139000 | -0.789197000 | 0.005452000                 |
| 6                                            | -1.936844000 | 0.553890000  | -0.001638000                |
| 6                                            | -1.296826000 | -1.794462000 | 0.005018000                 |
| 1                                            | -2.715141000 | 1.307144000  | -0.009706000                |
| 1                                            | -1.568688000 | -2.840324000 | 0.008729000                 |
| 6                                            | -0.597574000 | 0.938541000  | -0.008847000                |
| 6                                            | 0.050440000  | -1.405951000 | 0.001336000                 |
| 1                                            | 0.819145000  | -2.165045000 | 0.005891000                 |
| 6                                            | 0.391546000  | -0.065262000 | -0.004446000                |
| 8                                            | 1.671283000  | 0.411893000  | 0.001977000                 |
| 6                                            | 2.717568000  | -0.529937000 | 0.001226000                 |
| 1                                            | 2.679922000  | -1.162699000 | 0.891372000                 |
| 1                                            | 2.679067000  | -1.159672000 | -0.890794000                |
| 1                                            | 3.642689000  | 0.038885000  | 0.001303000                 |
| 7                                            | -0.206555000 | 2.266470000  | -0.072444000                |
| 1                                            | 0.744754000  | 2.441249000  | 0.208121000                 |
| 1                                            | -0.867149000 | 2.934299000  | 0.287757000                 |
| Zero-point correction=                       |              |              | 0.138201 (Hartree/Particle) |
| Thermal correction to Energy=                |              |              | 0.146237                    |
| Thermal correction to Enthalpy=              |              |              | 0.147181                    |
| Thermal correction to Gibbs Free Energy=     |              |              | 0.105343                    |
| Sum of electronic and zero-point Energies=   |              |              | -401.269720                 |
| Sum of electronic and thermal Energies=      |              |              | -401.261684                 |
| Sum of electronic and thermal Enthalpies=    |              |              | -401.260740                 |
| Sum of electronic and thermal Free Energies= |              |              | -401.302578                 |
| Electronic energy at ROCBS-QB3= -400.885555  |              |              |                             |

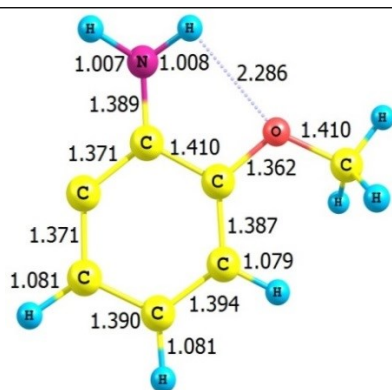

P13

|                                              |              |              |                             |
|----------------------------------------------|--------------|--------------|-----------------------------|
| 6                                            | -2.360438000 | -0.486668000 | 0.009072000                 |
| 6                                            | -1.791824000 | 0.760380000  | 0.002785000                 |
| 6                                            | -1.489347000 | -1.569575000 | 0.002442000                 |
| 1                                            | -1.875777000 | -2.579241000 | 0.003528000                 |
| 6                                            | -0.451402000 | 1.049141000  | -0.010178000                |
| 6                                            | -0.111774000 | -1.357804000 | -0.003632000                |
| 1                                            | 0.552866000  | -2.208393000 | -0.003550000                |
| 6                                            | 0.405459000  | -0.070955000 | -0.007334000                |
| 1                                            | -3.432549000 | -0.626315000 | 0.017532000                 |
| 8                                            | 1.731625000  | 0.239161000  | 0.000433000                 |
| 6                                            | 2.654503000  | -0.826342000 | 0.005995000                 |
| 1                                            | 2.531184000  | -1.448987000 | 0.895234000                 |
| 1                                            | 2.544387000  | -1.445074000 | -0.887452000                |
| 1                                            | 3.642280000  | -0.375207000 | 0.013746000                 |
| 7                                            | 0.077621000  | 2.331799000  | -0.079259000                |
| 1                                            | 1.031887000  | 2.402623000  | 0.236239000                 |
| 1                                            | -0.521684000 | 3.055650000  | 0.281180000                 |
| Zero-point correction=                       |              |              | 0.138220 (Hartree/Particle) |
| Thermal correction to Energy=                |              |              | 0.146408                    |
| Thermal correction to Enthalpy=              |              |              | 0.147352                    |
| Thermal correction to Gibbs Free Energy=     |              |              | 0.104963                    |
| Sum of electronic and zero-point Energies=   |              |              | -401.269414                 |
| Sum of electronic and thermal Energies=      |              |              | -401.261226                 |
| Sum of electronic and thermal Enthalpies=    |              |              | -401.260282                 |
| Sum of electronic and thermal Free Energies= |              |              | -401.302670                 |
| Electronic energy at ROCBS-QB3=              |              |              | -400.885994                 |

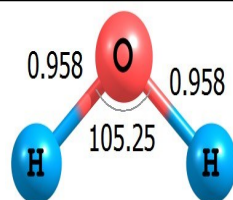

H<sub>2</sub>O

|                               |             |              |                             |
|-------------------------------|-------------|--------------|-----------------------------|
| 8                             | 0.000000000 | 0.000000000  | 0.116345000                 |
| 1                             | 0.000000000 | 0.761603000  | -0.465380000                |
| 1                             | 0.000000000 | -0.761603000 | -0.465380000                |
| Zero-point correction=        |             |              | 0.021671 (Hartree/Particle) |
| Thermal correction to Energy= |             |              | 0.024506                    |

|                                              |            |
|----------------------------------------------|------------|
| Thermal correction to Enthalpy=              | 0.025450   |
| Thermal correction to Gibbs Free Energy=     | 0.004040   |
| Sum of electronic and zero-point Energies=   | -76.403226 |
| Sum of electronic and thermal Energies=      | -76.400390 |
| Sum of electronic and thermal Enthalpies=    | -76.399446 |
| Sum of electronic and thermal Free Energies= | -76.420857 |
| Electronic energy at ROCBS-QB3=              | -76.358593 |

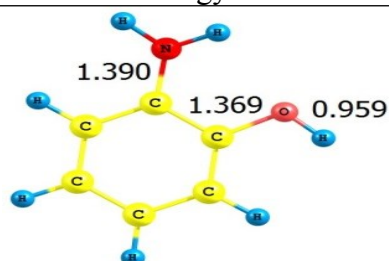

### 2AP

|                                              |              |                             |              |
|----------------------------------------------|--------------|-----------------------------|--------------|
| 6                                            | 1.925318000  | 0.627841000                 | 0.005752000  |
| 6                                            | 0.741536000  | 1.358222000                 | 0.001471000  |
| 6                                            | 1.869559000  | -0.755643000                | 0.004727000  |
| 1                                            | 0.764633000  | 2.442009000                 | 0.006387000  |
| 1                                            | 2.780477000  | -1.337567000                | 0.009419000  |
| 6                                            | -0.478247000 | 0.710150000                 | -0.005061000 |
| 6                                            | 0.641875000  | -1.405198000                | -0.003470000 |
| 1                                            | 0.597818000  | -2.487245000                | -0.011892000 |
| 6                                            | -0.548967000 | -0.688515000                | -0.009607000 |
| 1                                            | 2.875514000  | 1.141935000                 | 0.010880000  |
| 7                                            | -1.793838000 | -1.303438000                | -0.074390000 |
| 1                                            | -1.833309000 | -2.235913000                | 0.302155000  |
| 1                                            | -2.564623000 | -0.723703000                | 0.217197000  |
| 8                                            | -1.679616000 | 1.366160000                 | 0.000718000  |
| 1                                            | -1.533155000 | 2.314132000                 | 0.017968000  |
| Zero-point correction=                       |              | 0.122481 (Hartree/Particle) |              |
| Thermal correction to Energy=                |              | 0.129377                    |              |
| Thermal correction to Enthalpy=              |              | 0.130322                    |              |
| Thermal correction to Gibbs Free Energy=     |              | 0.091969                    |              |
| Sum of electronic and zero-point Energies=   |              | -362.680413                 |              |
| Sum of electronic and thermal Energies=      |              | -362.673516                 |              |
| Sum of electronic and thermal Enthalpies=    |              | -362.672572                 |              |
| Sum of electronic and thermal Free Energies= |              | -362.710924                 |              |
| Electronic energy at ROCBS-QB3=              |              | -362.338295                 |              |



Table S2. Variation of bond distances along the reaction coordinates for OH reaction with O-AND.

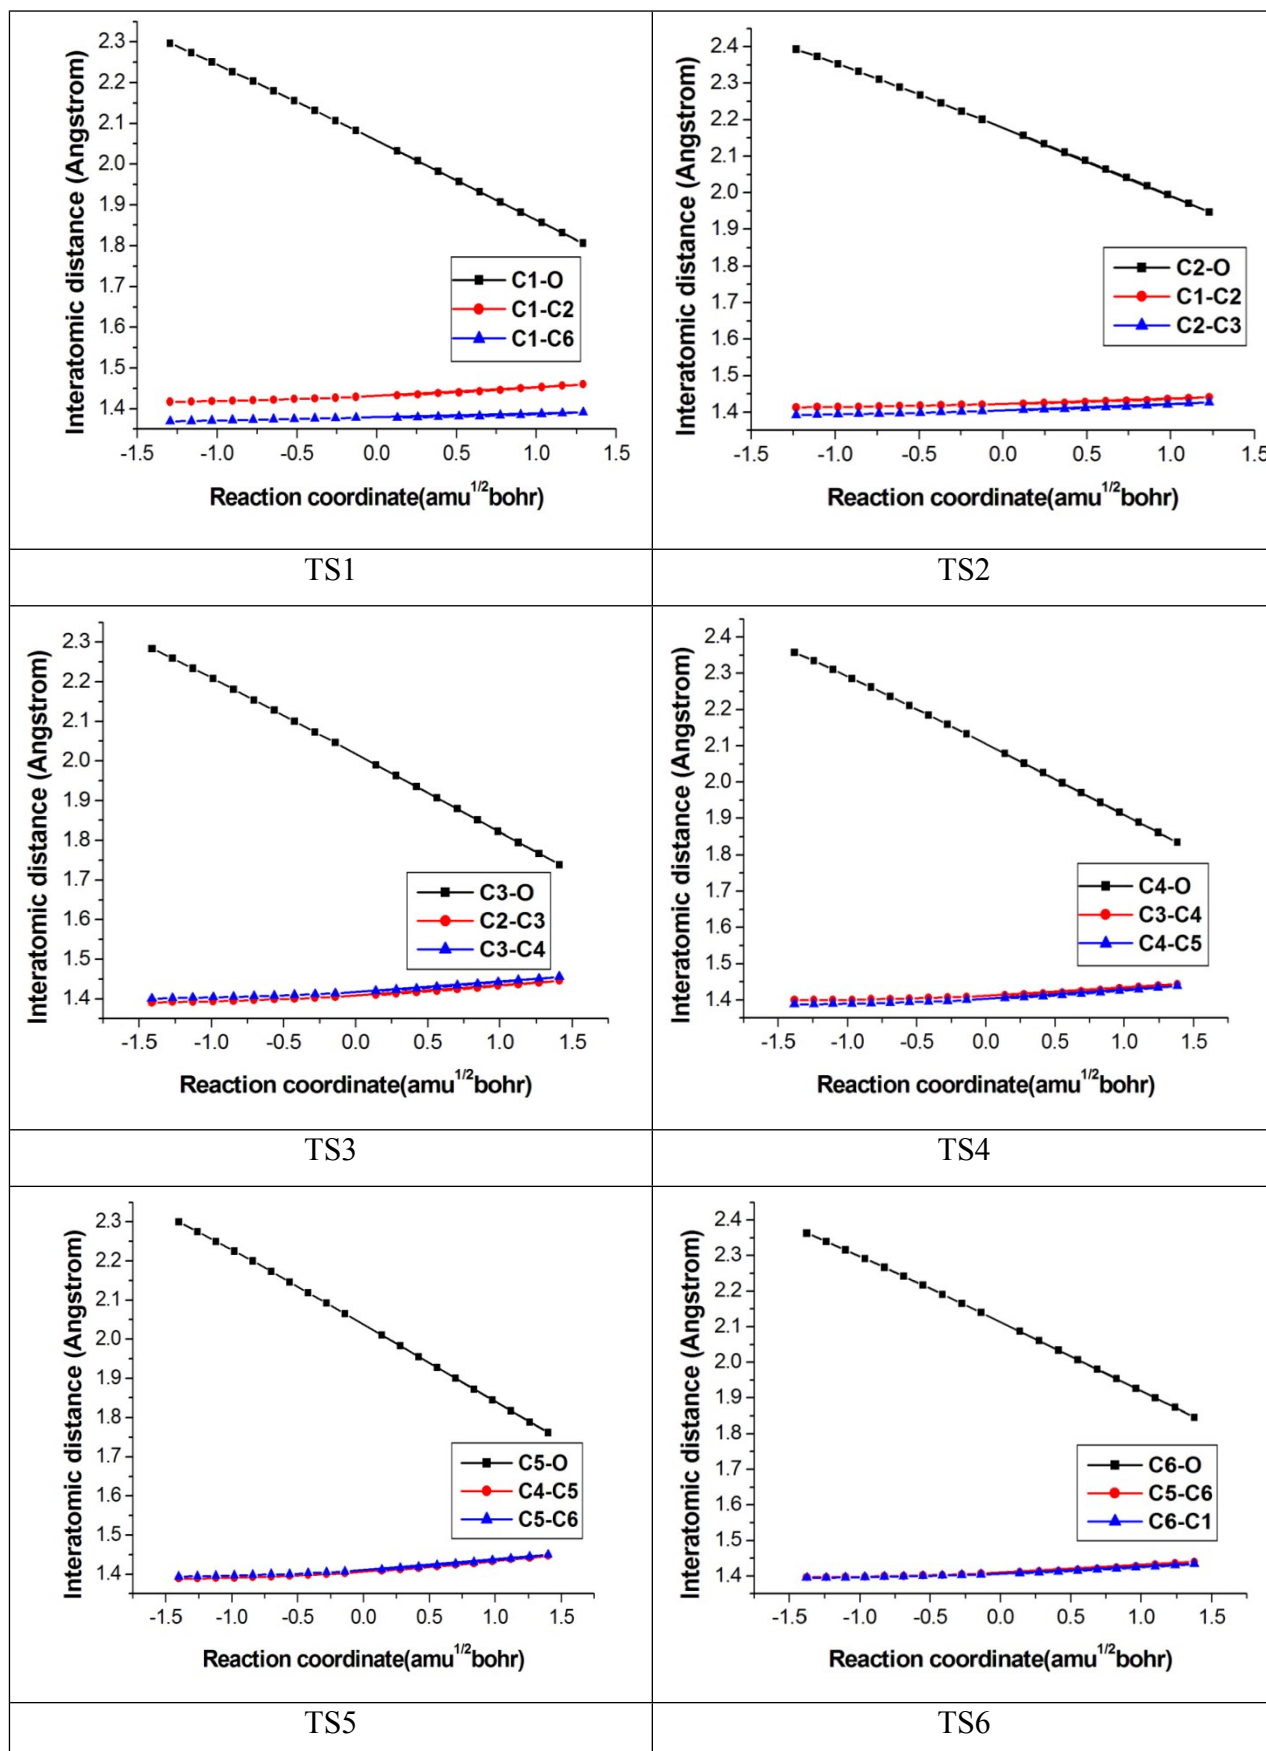

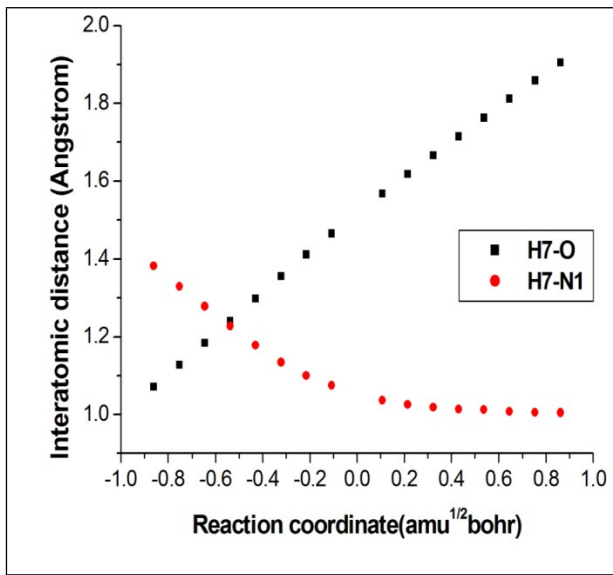

TS7

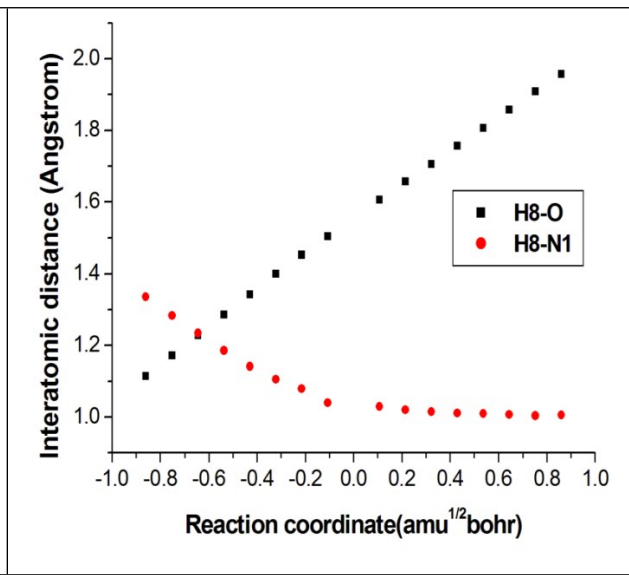

TS8

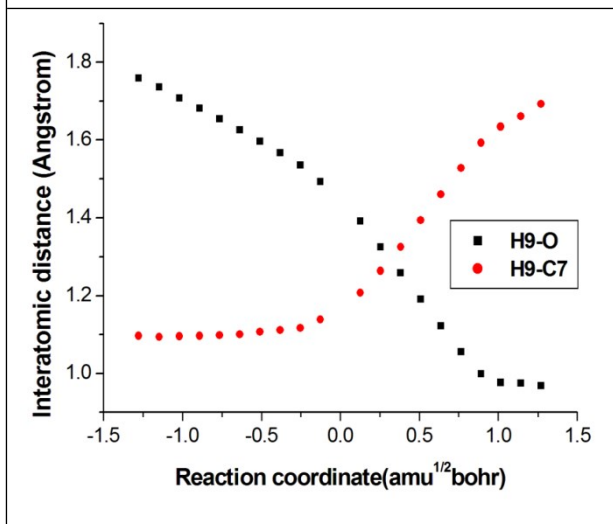

TS9

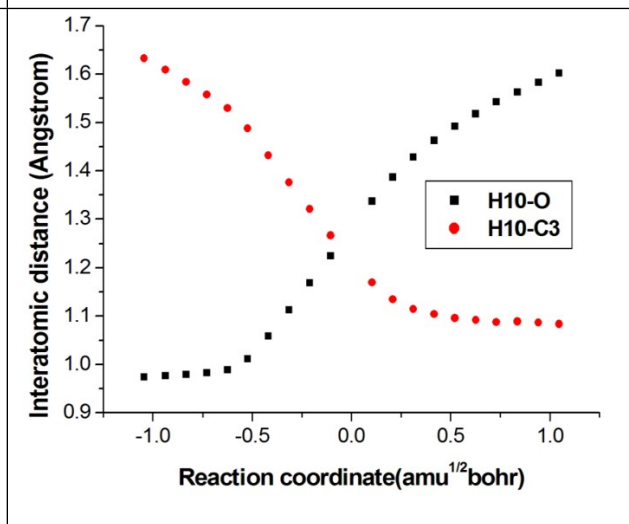

TS10

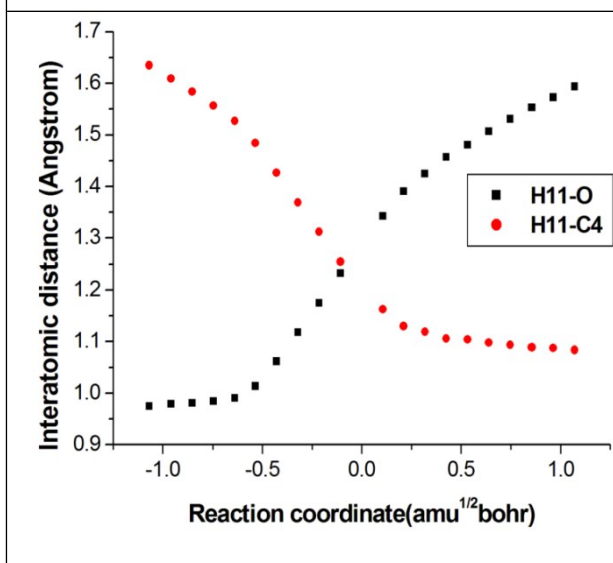

TS11

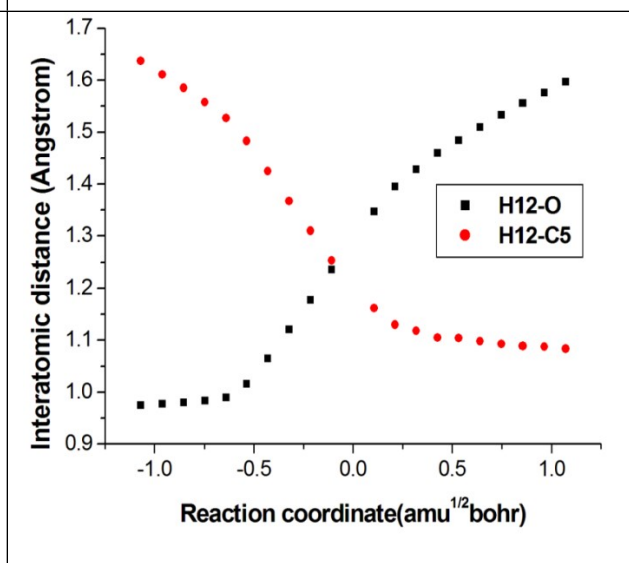

TS12

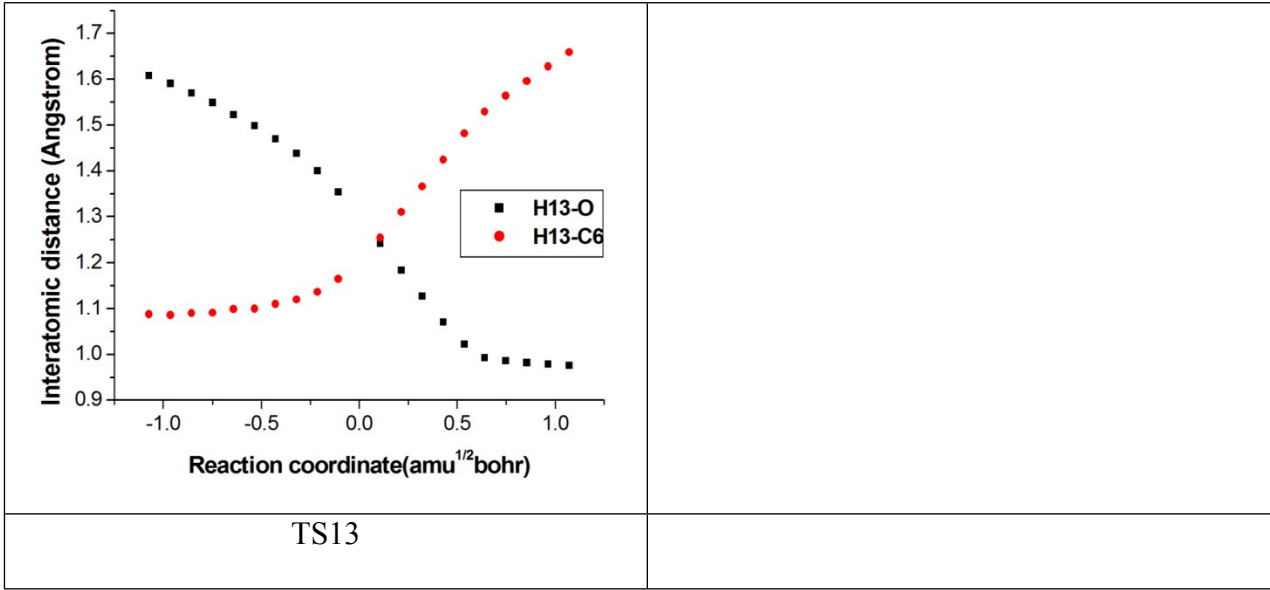

Table S3. Geometrical parameters (bond lengths and bond angles) of O-AND obtained at different levels.

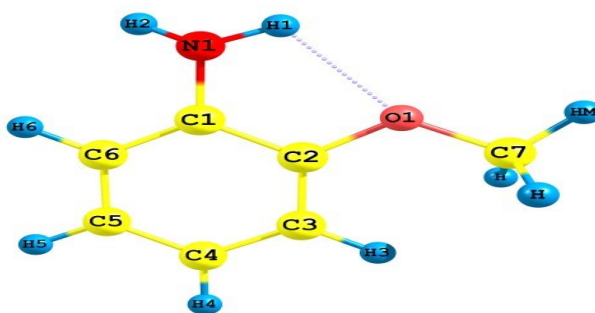

| Interatomic distance (Å)              | B3LYP/6-31G(d) <sup>a</sup> | B3LYP/6-311++G(d,p) <sup>a</sup> | M06-2X/6-311++G(2df,2p) |
|---------------------------------------|-----------------------------|----------------------------------|-------------------------|
| C1-C2                                 | 1.416                       | 1.413                            | 1.406                   |
| C2-C3                                 | 1.392                       | 1.390                            | 1.383                   |
| C3-C4                                 | 1.401                       | 1.399                            | 1.394                   |
| C4-C5                                 | 1.391                       | 1.389                            | 1.382                   |
| C5-C6                                 | 1.398                       | 1.395                            | 1.390                   |
| C1-C6                                 | 1.398                       | 1.396                            | 1.387                   |
| C2-O                                  | 1.376                       | 1.374                            | 1.364                   |
| C7-O                                  | 1.416                       | 1.420                            | 1.408                   |
| C1-N                                  | 1.397                       | 1.394                            | 1.389                   |
| N-H1                                  | 1.012                       | 1.010                            | 1.007                   |
| N-H2                                  | 1.012                       | 1.009                            | 1.006                   |
| C3-H3                                 | 1.086                       | 1.084                            | 1.080                   |
| C4-H4                                 | 1.086                       | 1.084                            | 1.080                   |
| C5-H5                                 | 1.086                       | 1.084                            | 1.080                   |
| C6-H6                                 | 1.086                       | 1.084                            | 1.080                   |
| C-H (meth.)                           | 1.096                       | 1.093                            | 1.093                   |
| <b>Bond angle</b>                     |                             |                                  |                         |
| C1-C2-C3                              | 120.6                       | 120.6                            | 120.6                   |
| C2-C3-C4                              | 120.1                       | 120.2                            | 120.1                   |
| C3-C4-C5                              | 119.8                       | 119.7                            | 119.8                   |
| C4-C5-C6                              | 120.1                       | 120.1                            | 120.1                   |
| C5-C6-C1                              | 121.0                       | 121.1                            | 121.0                   |
| C6-C1-C2                              | 118.3                       | 118.3                            | 118.5                   |
| N-C1-C2                               | 119.2                       | 119.3                            | 119.0                   |
| N-C1-C6                               | 122.4                       | 122.3                            | 122.5                   |
| C1-N-HN1                              | 113.5                       | 114.7                            | 114.6                   |
| C1-N-HN2                              | 114.5                       | 115.7                            | 115.4                   |
| H-N-H                                 | 112.3                       | 113.5                            | 113.5                   |
| H <sub>met</sub> -C-H <sub>meta</sub> | 109.3                       | 109.4                            | 109.4                   |
| C2-O-C7                               | 118.1                       | 118.5                            | 117.6                   |
| C1-C2-O                               | 114.2                       | 114.4                            | 114.6                   |
| C3-C2-O                               | 125.1                       | 125.0                            | 124.8                   |

Table S4. Calculated excitation energies (eV), wavelengths (nm), and oscillator strength (f, in a.u.) using TDDFT/6-311++G(2df,2p)//M06-2X/6-311++G(2df,2p) level of theory

| Structure              | Contributions         | Excitation energy (eV) | Wavelength (nm) | Oscillator Strength (f, in a.u.) |
|------------------------|-----------------------|------------------------|-----------------|----------------------------------|
| P1                     | Homo→Lumo + 2 (43%)   | 5.4299                 | 228.34          | 0.0013                           |
| P2                     | Homo→Lumo + 3 (40%)   | 4.7289                 | 262.18          | 0.0328                           |
| P3                     | Homo→Lumo + 5 (52%)   | 5.5254                 | 224.39          | 0.0207                           |
| P4                     | Homo→Lumo + 5 (45%)   | 4.8550                 | 255.38          | 0.0450                           |
| P5                     | Homo→Lumo + 2 (52%)   | 5.3328                 | 232.50          | 0.0029                           |
| P6                     | Homo→Lumo + 3 (43%)   | 5.1897                 | 238.91          | 0.0495                           |
| P7---H <sub>2</sub> O  | Homo-4→Lumo+2 (52%)   | 5.3226                 | 232.94          | 0.0325                           |
| P8---H <sub>2</sub> O  | Homo-4→Lumo+2 (45%)   | 5.5215                 | 224.55          | 0.0058                           |
| P9---H <sub>2</sub> O  | Homo-5→Lumo + 1 (61%) | 4.7701                 | 259.92          | 0.0003                           |
| P10---H <sub>2</sub> O | Homo→Lumo + 5 (70%)   | 4.8616                 | 255.03          | 0.0021                           |
| P11---H <sub>2</sub> O | Homo→Lumo + 5 (73%)   | 5.0225                 | 246.86          | 0.0120                           |
| P12---H <sub>2</sub> O | Homo→Lumo + 3 (75%)   | 5.1067                 | 242.78          | 0.0183                           |
| P13---H <sub>2</sub> O | Homo→Lumo + 6 (65%)   | 5.0921                 | 243.48          | 0.0031                           |

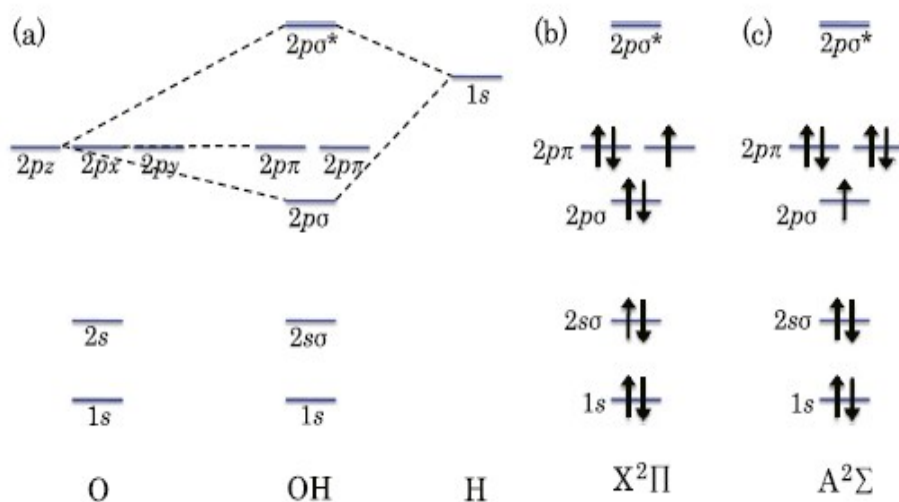

Fig S1. (a) Energy level diagram of electrons in O, H atoms and OH molecule. (b) Electronic configuration in the ground state X<sup>2</sup>Π, and (c) in the first excited A<sup>2</sup>Σ state.

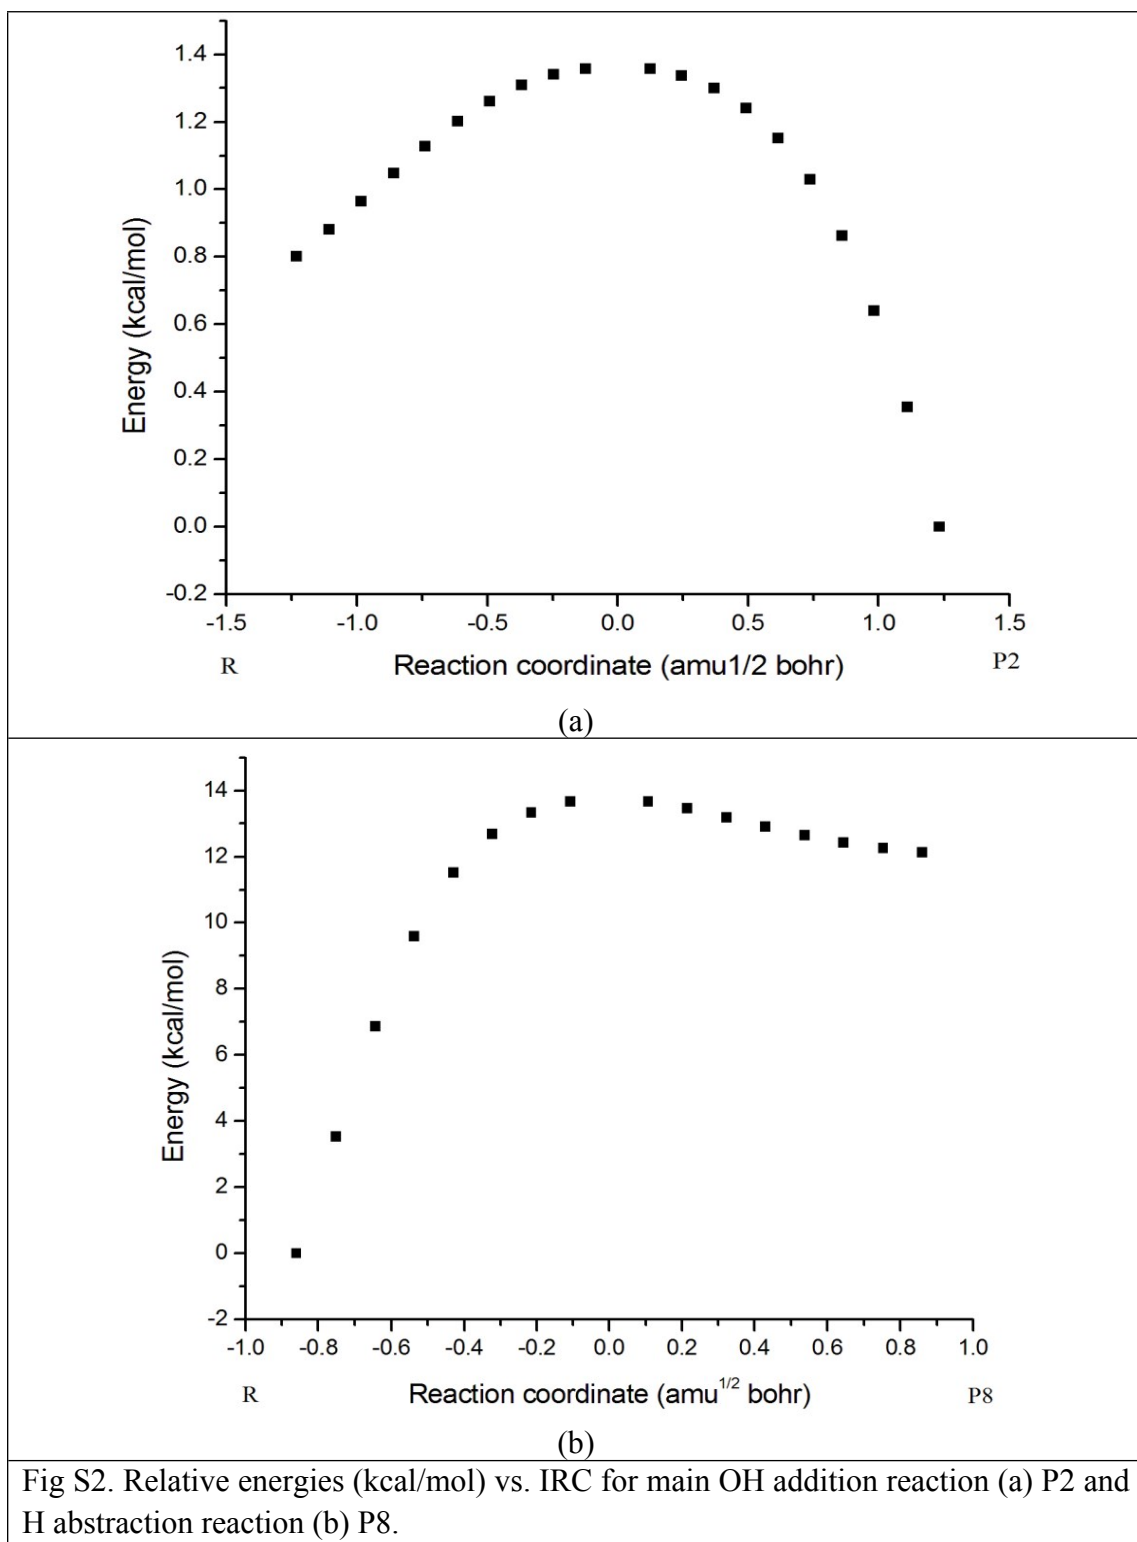

Supplement: d0nj06248k1.pdf [file d0nj06248k1.pdf]
